# Supplementary material
Source: Elsevier journal article supplement (https://www.sciencedirect.com/science/article/pii/S253006442030002X)
Supplement: mmc2 [file S253006442030002X:mmc2.docx]

**Appendix S2. Ornithological collections of international museums that kindly provided data analyzed in this study.** The list includes: AUSTRIA: Naturhistorische Museum Wien; BOLIVIA: Colección Boliviana de Fauna at Museo de Historia Natural, and Museo de Historia Natural Noel Kempff Mercado; CANADA: Canadian Museum of Nature, and University of British Columbia (Museum of Zoology); COSTA RICA: Museo Nacional de Costa Rica; ECUADOR: Museo de Zoología de la Universidad Tecnológica Indoamerica (MZUTI; Ecuador) and Museo Ecuatoriano de Ciencias Naturales (MECN); FRANCE: Museum Nationale D'histoire Naturelle Paris; GERMANY: Museum Mensch Und Natur Munich, Senckenberg Museum Frankfurt, Staatliche Museen Fur Naturkunde Stuttgart, Übersee-Museum Bremen, and Zoologische Forschungsinstitut Und Museum Alexander Koenig; ITALY: Museo Civico di Storia Naturale Di Milano, Museo Civico Federico Craveri Di Storia Naturale, Museo Regionali di Scienze Naturali Torino; PERU: Museo de Historia Natural Universidad Nacional de San Agustín (Cusco); MEXICO: Centro de Investigaciones De Quintana Roo (ahora en ECOSUR Chetumal), Colección Nacional de Aves (Instituto de Biología, UNAM), Colección Ornitológica del Centro de Investigaciones Biológicas (UAEM), Datasets at Comisión Nacional para el Conocimiento y Uso de la Biodiversidad (CONABIO), Colegio de la Frontera Sur (Unidad Chetumal), Instituto de Ecología (INECOL, A.C.), Museo de la Biodiversidad Maya (Universidad Autónoma de Campeche), Museo de las Aves de México, Museo de Zoología (Facultad de Ciencias; UNAM), Museo de Zoología (FES Zaragoza, UNAM), Sociedad para el estudio de los Recursos Naturales Bióticos de Oaxaca, Universidad Autónoma de Chihuahu, Universidad Autónoma de Nuevo León, Universidad Autónoma de Querétaro, Universidad Autónoma de Sinaloa, Universidad Autónoma de Tamaulipas, Universidad Autónoma de Yucatán, Universidad Autónoma de Zacatecas, Universidad Autónoma del Estado de México, Universidad Autónoma del Estado de Morelos, Universidad de Ciencias y Artes de Chiapas, Universidad de Montemorelos, and Universidad Michoacana de San Nicolás de Hidalgo; NETHERLANDS: Natuurhistorische Musem Leiden; SPAIN: Museo Nacional de Ciencias Naturales at Consejo Superior de investigaciones Científicas (CSIC); UNITED KINGDOM: Natural History Museum; UNITED STATES OF AMERICA: Academy of Natural Sciences of Philadelphia, American Museum of Natural History, Bell Museum of Natural History at University of Minnesota, Burke Museum at University of Washington, California Academy of Sciences, Carnegie Museum of Natural History, College of Natural Sciences (University of Texas at Austin), Cornell University Museum of Comparative Zoology at Harvard University, Museum of Vertebrate Zoology (Berkley), Museum of Vertebrates, Delaware Museum of Natural History, Denver Museum of Natural History, Field Museum of Natural History, Florida Museum of Natural History, Fort Hays State College, Los Angeles County Museum of Natural History, Louisiana State University Moore Laboratory of Zoology (Occidental College), Museum of Zoology, Oklahoma Museum Natural History, Peabody Museum at Yale University, Royal Ontario Museum, San Diego Natural History Museum, Southwestern College, Texas Cooperative Wildlife Collections, United States National Museum of Natural History, University of Alabama Biodiversity and Systematics, University Museum of Zoology at University of Cambridge, University of Nevada Las Vegas, University of Arizona, University of California Los Angeles, University of Connecticut University of Kansas (Natural History Museum), University of Michigan (Museum of Zoology), Western Foundation of Vertebrate Zoology; and VENEZUELA: Colección Ornitológica Phelps (Fundación William H. Phelps), Estación Biológica Rancho Grande (Ministerio del Poder Popular para el Ecosocialismo y Agua [MINEA]), Museo de Biología de la Universidad del Zulia (MBLUZ), Museo de Historia Natural La Salle (Fundación de Ciencias Naturales La Salle).
