# Supplementary material
Source: Elsevier journal article supplement (https://www.sciencedirect.com/science/article/pii/S253006442030002X)
Supplement: mmc3 [file S253006442030002X:mmc3.docx]

**Appendix S3. Details about the access number for the data of occurrences downloaded directly from the Global Biodiversity Information Facility (GBIF).**

GBIF.org (04 June 2019). GBIF Occurrence Download Accipiter bicolor (Vieillot, 1807). Available in: <https://doi.org/10.15468/dl.hr702j>

GBIF.org (04 June 2019). GBIF Occurrence Download Accipiter chionogaster (Kaup, 1852). Available in: <https://doi.org/10.15468/dl.ynrrk6>

GBIF.org (04 June 2019). GBIF Occurrence Download Accipiter cooperii (Bonaparte, 1828). Available in: <https://doi.org/10.15468/dl.sop6on>

GBIF.org (10 June 2019). GBIF Occurrence Download Accipiter gundlachi Lawrence, 1860. Available in: <https://doi.org/10.15468/dl.8knbee>

GBIF.org (10 June 2019). GBIF Occurrence Download Accipiter striatus Vieillot, 1807. Available in: <https://doi.org/10.15468/dl.2atcgx>

GBIF.org (10 June 2019). GBIF Occurrence Download Accipiter ventralis Sclater, PL, 1866. Available in: <https://doi.org/10.15468/dl.1f9wzv>

GBIF.org (10 June 2019). GBIF Occurrence Download Busarellus nigricollis (Latham, 1790). Available in: <https://doi.org/10.15468/dl.eoqhof>

GBIF.org (10 June 2019). GBIF Occurrence Download Buteo brachyurus Vieillot, 1816. Available in: <https://doi.org/10.15468/dl.n3nndy>

GBIF.org (10 June 2019). GBIF Occurrence Download Buteo jamaicensis (Gmelin, JF, 1788). Available in: <https://doi.org/10.15468/dl.gkhjpp>

GBIF.org (10 June 2019). GBIF Occurrence Download Buteo nitidus (Latham, 1790). Available in: <https://doi.org/10.15468/dl.ktt4p8>

GBIF.org (10 June 2019). GBIF Occurrence Download Buteogallus anthracinus (Deppe, 1830). Available in: <https://doi.org/10.15468/dl.xhz3t8>

GBIF.org (10 June 2019). GBIF Occurrence Download Buteogallus gundlachii (Cabanis, 1855). Available in: <https://doi.org/10.15468/dl.qd6rry>

GBIF.org (10 June 2019). GBIF Occurrence Download Buteogallus meridionalis (Latham, 1790). Available in: <https://doi.org/10.15468/dl.fl2scm>

GBIF.org (10 June 2019). GBIF Occurrence Download Buteogallus urubitinga (Gmelin, 1788). Available in: <https://doi.org/10.15468/dl.tdws3b>

GBIF.org (10 June 2019). GBIF Occurrence Download Chondrohierax uncinatus (Temminck, 1822). Available in: <https://doi.org/10.15468/dl.jmoeaw>

GBIF.org (10 June 2019). GBIF Occurrence Download Circus buffoni (Gmelin, JF, 1788). Available in: <https://doi.org/10.15468/dl.idzn0d>

GBIF.org (10 June 2019). GBIF Occurrence Download Elanus leucurus (Vieillot, 1818). Available in: <https://doi.org/10.15468/dl.virrtq>

GBIF.org (10 June 2019). GBIF Occurrence Download Gampsonyx swainsonii Vigors, 1825. Available in: <https://doi.org/10.15468/dl.724hax>

GBIF.org (10 June 2019). GBIF Occurrence Download Geranoaetus albicaudatus (Vieillot, 1816). Available in: <https://doi.org/10.15468/dl.qzqzxz>

GBIF.org (10 June 2019). GBIF Occurrence Download Geranoaetus melanoleucus (Vieillot, 1819). Available in: <https://doi.org/10.15468/dl.v1qpv8>

GBIF.org (10 June 2019). GBIF Occurrence Download Geranospiza caerulescens (Vieillot, 1817). Available in: <https://doi.org/10.15468/dl.kegrmu>

GBIF.org (10 June 2019). GBIF Occurrence Download Leptodon cayanensis (Latham, 1790). Available in: <https://doi.org/10.15468/dl.5y3zv9>

GBIF.org (10 June 2019). GBIF Occurrence Download Parabuteo unicinctus (Temminck, 1824). Available in: <https://doi.org/10.15468/dl.kxr6dj>

GBIF.org (10 June 2019). GBIF Occurrence Download Rostrhamus sociabilis (Vieillot, 1817). Available in: <https://doi.org/10.15468/dl.3yu6rg>

GBIF.org (10 June 2019). GBIF Occurrence Download Rupornis magnirostris (Gmelin, JF, 1788). Available in: <https://doi.org/10.15468/dl.1wd8ug>

GBIF.org (10 June 2019). GBIF Occurrence Download Spizaetus melanoleucus (Vieillot, 1816). Available in: <https://doi.org/10.15468/dl.i600hv>

GBIF.org (10 June 2019). GBIF Occurrence Download Spizaetus ornatus (Daudin, 1800). Available in: <https://doi.org/10.15468/dl.pmeauf>

GBIF.org (10 June 2019). GBIF Occurrence Download Spizaetus tyrannus (zu Wied-Neuwied, 1820). Available in: <https://doi.org/10.15468/dl.mntrh4>

GBIF.org (10 June 2019). GBIF Occurrence Download Cathartes aura (Linnaeus, 1758). Available in: <https://doi.org/10.15468/dl.vwo9jy>

GBIF.org (10 June 2019). GBIF Occurrence Download Cathartes burrovianus Cassin, 1845. Available in: <https://doi.org/10.15468/dl.d5tp1s>

GBIF.org (10 June 2019). GBIF Occurrence Download Coragyps atratus (Bechstein, 1793). Available in: <https://doi.org/10.15468/dl.oy1pnt>

GBIF.org (10 June 2019). GBIF Occurrence Download Anas bahamensis Linnaeus, 1758. Available in: <https://doi.org/10.15468/dl.1wgg9r>

GBIF.org (10 June 2019). GBIF Occurrence Download Cairina moschata (Linnaeus, 1758). Available in: <https://doi.org/10.15468/dl.cxcgxs>

GBIF.org (10 June 2019). GBIF Occurrence Download Dendrocygna arborea (Linnaeus, 1758). Available in: <https://doi.org/10.15468/dl.8nclhf>

GBIF.org (10 June 2019). GBIF Occurrence Download Dendrocygna autumnalis (Linnaeus, 1758). Available in: <https://doi.org/10.15468/dl.pdo3xk>

GBIF.org (10 June 2019). GBIF Occurrence Download Dendrocygna bicolor (Vieillot, 1816). Available in: <https://doi.org/10.15468/dl.wnwmaw>

GBIF.org (10 June 2019). GBIF Occurrence Download Dendrocygna viduata (Linnaeus, 1766). Available in: <https://doi.org/10.15468/dl.fm0rfc>

GBIF.org (10 June 2019). GBIF Occurrence Download Netta erythrophthalma (zu Wied-Neuwied, 1833). Available in: <https://doi.org/10.15468/dl.efxyx8>

GBIF.org (10 June 2019). GBIF Occurrence Download Chauna chavaria (Linnaeus, 1766). Available in: <https://doi.org/10.15468/dl.9uzdou>

GBIF.org (10 June 2019). GBIF Occurrence Download Chaetura vauxi (Townsend, 1839). Available in: <https://doi.org/10.15468/dl.7lk4vb>

GBIF.org (10 June 2019). GBIF Occurrence Download Cypseloides storeri Navarro, Peterson, Escalante & Benitez, 1992. Available in: <https://doi.org/10.15468/dl.qno7w8>

GBIF.org (10 June 2019). GBIF Occurrence Download Panyptila sanctihieronymi Salvin, 1863. Available in: <https://doi.org/10.15468/dl.kt6dyw>

GBIF.org (10 June 2019). GBIF Occurrence Download Streptoprocne rutila (Vieillot, 1817). Available in: <https://doi.org/10.15468/dl.gykgqr>

GBIF.org (10 June 2019). GBIF Occurrence Download Streptoprocne semicollaris (DeSaussure, 1859). Available in: <https://doi.org/10.15468/dl.oycvdv>

GBIF.org (10 June 2019). GBIF Occurrence Download Streptoprocne zonaris (Shaw, 1796). Available in: <https://doi.org/10.15468/dl.bqcquq>

GBIF.org (10 June 2019). GBIF Occurrence Download Tachornis furcata (Sutton, 1928). Available in: <https://doi.org/10.15468/dl.meeztf>

GBIF.org (10 June 2019). GBIF Occurrence Download Tachornis phoenicobia Gosse, 1847. Available in: <https://doi.org/10.15468/dl.uyotrj>

GBIF.org (10 June 2019). GBIF Occurrence Download Amazilia cyanocephala (Lesson, R, 1830). Available in: <https://doi.org/10.15468/dl.jvzfiz>

GBIF.org (10 June 2019). GBIF Occurrence Download Amazilia cyanura Gould, 1859. Available in: <https://doi.org/10.15468/dl.nomqpl>

GBIF.org (10 June 2019). GBIF Occurrence Download Amazilia fimbriata (Gmelin, JF, 1788). Available in: <https://doi.org/10.15468/dl.amq9eu>

GBIF.org (10 June 2019). GBIF Occurrence Download Amazilia franciae (Bourcier & Mulsant, 1846). Available in: <https://doi.org/10.15468/dl.s6zqfc>

GBIF.org (10 June 2019). GBIF Occurrence Download Amazilia rutila (Delattre, 1843). Available in: <https://doi.org/10.15468/dl.jlxdc9>

GBIF.org (10 June 2019). GBIF Occurrence Download Amazilia saucerrottei (Delattre & Bourcier, 1846). Available in: <https://doi.org/10.15468/dl.bjjt7m>

GBIF.org (10 June 2019). GBIF Occurrence Download Amazilia tobaci (Gmelin, JF, 1788). Available in: <https://doi.org/10.15468/dl.bkls0l>

GBIF.org (10 June 2019). GBIF Occurrence Download Amazilia violiceps (Gould, 1859). Available in: <https://doi.org/10.15468/dl.n2n1el>

GBIF.org (10 June 2019). GBIF Occurrence Download Amazilia viridifrons (Elliot, DG, 1871). Available in: <https://doi.org/10.15468/dl.mfbloi>

GBIF.org (10 June 2019). GBIF Occurrence Download Amazilia yucatanensis (Cabot, S, 1845). Available in: <https://doi.org/10.15468/dl.a0d4i1>

GBIF.org (10 June 2019). GBIF Occurrence Download Anthracothorax nigricollis (Vieillot, 1817). Available in: <https://doi.org/10.15468/dl.5lxr74>

GBIF.org (10 June 2019). GBIF Occurrence Download Anthracothorax prevostii (Lesson, R, 1832). Available in: <https://doi.org/10.15468/dl.vkqcdo>

GBIF.org (10 June 2019). GBIF Occurrence Download Atthis ellioti Ridgway, 1878. Available in: <https://doi.org/10.15468/dl.y8i8cr>

GBIF.org (10 June 2019). GBIF Occurrence Download Atthis heloisa (Lesson, R & Delattre, 1839). Available in: <https://doi.org/10.15468/dl.kanblr>

GBIF.org (10 June 2019). GBIF Occurrence Download Basilinna leucotis (Vieillot, 1818). Available in: <https://doi.org/10.15468/dl.yhsieq>

GBIF.org (10 June 2019). GBIF Occurrence Download Basilinna xantusii (Lawrence, 1861). Available in: <https://doi.org/10.15468/dl.bj0uo7>

GBIF.org (11 June 2019). GBIF Occurrence Download Aglaiocercus berlepschi (Hartert, 1898). Available in: <https://doi.org/10.15468/dl.mzfgmr>

GBIF.org (11 June 2019). GBIF Occurrence Download Amazilia beryllina (Deppe, 1830). Available in: <https://doi.org/10.15468/dl.yhfzec>

GBIF.org (11 June 2019). GBIF Occurrence Download Amazilia candida (Bourcier & Mulsant, 1846). Available in: <https://doi.org/10.15468/dl.nipmcb>

GBIF.org (11 June 2019). GBIF Occurrence Download Calliphlox amethystina (Boddaert, 1783). Available in: <https://doi.org/10.15468/dl.zoo1si>

GBIF.org (11 June 2019). GBIF Occurrence Download Calothorax pulcher Gould, 1859. Available in: <https://doi.org/10.15468/dl.9dasqs>

GBIF.org (11 June 2019). GBIF Occurrence Download Campylopterus curvipennis (Deppe, 1830). Available in: <https://doi.org/10.15468/dl.37lhzs>

GBIF.org (11 June 2019). GBIF Occurrence Download Campylopterus ensipennis (Swainson, 1822). Available in: <https://doi.org/10.15468/dl.p5xutd>

GBIF.org (11 June 2019). GBIF Occurrence Download Campylopterus falcatus (Swainson, 1821). Available in: <https://doi.org/10.15468/dl.esvge0>

GBIF.org (11 June 2019). GBIF Occurrence Download Campylopterus hemileucurus (Deppe, 1830). Available in: <https://doi.org/10.15468/dl.hvujdw>

GBIF.org (11 June 2019). GBIF Occurrence Download Campylopterus pampa (Lesson, R, 1832). Available in: <https://doi.org/10.15468/dl.aoiaty>

GBIF.org (11 June 2019). GBIF Occurrence Download Campylopterus rufus (Lesson, R, 1840). Available in: <https://doi.org/10.15468/dl.shrsok>

GBIF.org (11 June 2019). GBIF Occurrence Download Chalybura buffonii (Lesson, 1832). Available in: <https://doi.org/10.15468/dl.uty3of>

GBIF.org (11 June 2019). GBIF Occurrence Download Chlorostilbon alice (Bourcier & Mulsant, 1848). Available in: <https://doi.org/10.15468/dl.y7wcxb>

GBIF.org (11 June 2019). GBIF Occurrence Download Chlorostilbon auriceps (Gould, 1852). Available in: <https://doi.org/10.15468/dl.hlyrvx>

GBIF.org (11 June 2019). GBIF Occurrence Download Chlorostilbon canivetii (Lesson, R, 1832). Available in: <https://doi.org/10.15468/dl.qmkhf6>

GBIF.org (11 June 2019). GBIF Occurrence Download Chlorostilbon forficatus Ridgway, 1885. Available in: <https://doi.org/10.15468/dl.hllu9r>

GBIF.org (11 June 2019). GBIF Occurrence Download Chlorostilbon gibsoni (Fraser, 1840). Available in: <https://doi.org/10.15468/dl.r4aahp>

GBIF.org (11 June 2019). GBIF Occurrence Download Chlorostilbon ricordii (Gervais, 1835). Available in: <https://doi.org/10.15468/dl.shccee>

GBIF.org (11 June 2019). GBIF Occurrence Download Chlorostilbon russatus (Salvin & Godman, 1881). Available in: <https://doi.org/10.15468/dl.hyl8ud>

GBIF.org (11 June 2019). GBIF Occurrence Download Chlorostilbon swainsonii Lesson, R, 1829. Available in: <https://doi.org/10.15468/dl.xoyvdk>

GBIF.org (11 June 2019). GBIF Occurrence Download Chrysolampis mosquitus (Linnaeus, 1758). Available in: <https://doi.org/10.15468/dl.lv3ljk>

GBIF.org (11 June 2019). GBIF Occurrence Download Colibri delphinae (Lesson, R, 1839). Available in: <https://doi.org/10.15468/dl.sxnhao>

GBIF.org (11 June 2019). GBIF Occurrence Download Colibri thalassinus (Swainson, 1827). Available in: <https://doi.org/10.15468/dl.xhmjvo>

GBIF.org (11 June 2019). GBIF Occurrence Download Cynanthus sordidus (Gould, 1859). Available in: <https://doi.org/10.15468/dl.hw8gdi>

GBIF.org (11 June 2019). GBIF Occurrence Download Cynanthus latirostris Swainson, 1827. Available in: <https://doi.org/10.15468/dl.b8bylg>

GBIF.org (11 June 2019). GBIF Occurrence Download Doricha enicura (Vieillot, 1818). Available in: <https://doi.org/10.15468/dl.e03mox>

GBIF.org (11 June 2019). GBIF Occurrence Download Doricha eliza (Lesson, R & Delattre, 1839). Available in: <https://doi.org/10.15468/dl.p4byu9>

GBIF.org (11 June 2019). GBIF Occurrence Download Eugenes fulgens (Swainson, 1827). Available in: <https://doi.org/10.15468/dl.pkvrk5>

GBIF.org (11 June 2019). GBIF Occurrence Download Eupherusa cyanophrys Rowley, JS & Orr, 1964. Available in: <https://doi.org/10.15468/dl.ckukhk>

GBIF.org (11 June 2019). GBIF Occurrence Download Eupherusa poliocerca Elliot, DG, 1871. Available in: <https://doi.org/10.15468/dl.qmnoq1>

GBIF.org (11 June 2019). GBIF Occurrence Download Eupherusa eximia (Delattre, 1843). Available in: <https://doi.org/10.15468/dl.vnldt0>

GBIF.org (11 June 2019). GBIF Occurrence Download Heliomaster constantii (Delattre, 1843). Available in: <https://doi.org/10.15468/dl.8gkupb>

GBIF.org (11 June 2019). GBIF Occurrence Download Heliomaster longirostris (Audebert & Vieillot, 1801). Available in: <https://doi.org/10.15468/dl.2u6jf9>

GBIF.org (11 June 2019). GBIF Occurrence Download Hylocharis cyanus (Vieillot, 1818). Available in: <https://doi.org/10.15468/dl.vdt1wy>

GBIF.org (11 June 2019). GBIF Occurrence Download Hylocharis eliciae(Wetmore, 1967). Available in: <https://doi.org/10.15468/dl.wzn5de>

GBIF.org (11 June 2019). GBIF Occurrence Download Juliamyia julie (Bourcier, 1843). Available in: <https://doi.org/10.15468/dl.2is9i6>

GBIF.org (11 June 2019). GBIF Occurrence Download Lampornis amethystinusSwainson, 1827. Available in: <https://doi.org/10.15468/dl.zw5zuk>

GBIF.org (11 June 2019). GBIF Occurrence Download Lampornis clemenciae (Lesson, R, 1830). Available in: <https://doi.org/10.15468/dl.6hfguz>

GBIF.org (11 June 2019). GBIF Occurrence Download Lampornis viridipallens (Bourcier & Mulsant, 1846). Available in: <https://doi.org/10.15468/dl.fwr5qr>

GBIF.org (11 June 2019). GBIF Occurrence Download Lamprolaima rhami (Lesson, R, 1839). Available in: <https://doi.org/10.15468/dl.qhpxez>

GBIF.org (11 June 2019). GBIF Occurrence Download Lepidopyga coeruleogularis (Gould, 1851). Available in: <https://doi.org/10.15468/dl.enoftj>

GBIF.org (11 June 2019). GBIF Occurrence Download Lepidopyga goudoti (Bourcier, 1843). Available in: <https://doi.org/10.15468/dl.aqnjez>

GBIF.org (11 June 2019). GBIF Occurrence Download Lepidopyga lilliae Stone, 1917. Available in: <https://doi.org/10.15468/dl.kf8n6m>

GBIF.org (11 June 2019). GBIF Occurrence Download Leucippus fallax (Bourcier, 1843). Available in: <https://doi.org/10.15468/dl.cgcuyx>

GBIF.org (11 June 2019). GBIF Occurrence Download Lophornis brachylophus Moore, RT, 1949. Available in: <https://doi.org/10.15468/dl.znip7l>

GBIF.org (11 June 2019). GBIF Occurrence Download Lophornis stictolophus Salvin & Elliot, 1873. Available in: <https://doi.org/10.15468/dl.8j4wue>

GBIF.org (11 June 2019). GBIF Occurrence Download Mellisuga minima (Linnaeus, 1758). Available in: <https://doi.org/10.15468/dl.51ay2a>

GBIF.org (11 June 2019). GBIF Occurrence Download Phaeochroa cuvierii (Delattre & Bourcier, 1846). Available in: <https://doi.org/10.15468/dl.tgd4bb>

GBIF.org (11 June 2019). GBIF Occurrence Download Phaethornis anthophilus (Bourcier, 1843). Available in: <https://doi.org/10.15468/dl.gsm9zd>

GBIF.org (11 June 2019). GBIF Occurrence Download Phaethornis augusti (Bourcier, 1847). Available in: <https://doi.org/10.15468/dl.k6zx2i>

GBIF.org (11 June 2019). GBIF Occurrence Download Phaethornis griseogularis Gould, 1851. Available in: <https://doi.org/10.15468/dl.bvkcbo>

GBIF.org (11 June 2019). GBIF Occurrence Download Phaethornis longirostris (Delattre, 1843). Available in: <https://doi.org/10.15468/dl.aaa6jz>

GBIF.org (11 June 2019). GBIF Occurrence Download Phaethornis mexicanus Hartert, 1897. Available in: <https://doi.org/10.15468/dl.hsxzt8>

GBIF.org (11 June 2019). GBIF Occurrence Download Phaethornis striigularis Gould, 1854. Available in: <https://doi.org/10.15468/dl.zctod4>

GBIF.org (11 June 2019). GBIF Occurrence Download Polytmus guainumbi (Pallas, 1764). Available in: <https://doi.org/10.15468/dl.j5f9mz>

GBIF.org (11 June 2019). GBIF Occurrence Download Thalurania ridgwayi (Nelson, 1900). Available in: <https://doi.org/10.15468/dl.riu0my>

GBIF.org (11 June 2019). GBIF Occurrence Download Tilmatura dupontii (Lesson, R, 1832). Available in: <https://doi.org/10.15468/dl.ryijp8>

GBIF.org (11 June 2019). GBIF Occurrence Download Antrostomus arizonae Brewster, 1881. Available in: <https://doi.org/10.15468/dl.aws5sl>

GBIF.org (11 June 2019). GBIF Occurrence Download Antrostomus badius Bangs & Peck, 1908. Available in: <https://doi.org/10.15468/dl.jrz7nx>

GBIF.org (11 June 2019). GBIF Occurrence Download Antrostomus cubanensis Lawrence, 1861. Available in: <https://doi.org/10.15468/dl.zlnort>

GBIF.org (11 June 2019). GBIF Occurrence Download Antrostomus ridgwayi Nelson, 1897. Available in: <https://doi.org/10.15468/dl.whwgcq>

GBIF.org (11 June 2019). GBIF Occurrence Download Antrostomus rufus (Boddaert, 1783). Available in: <https://doi.org/10.15468/dl.bp3jxt>

GBIF.org (11 June 2019). GBIF Occurrence Download Chordeiles nacunda (Vieillot, 1817). Available in: <https://doi.org/10.15468/dl.on2nbe>

GBIF.org (11 June 2019). GBIF Occurrence Download Hydropsalis cayennensis (Gmelin, JF, 1789). Available in: <https://doi.org/10.15468/dl.pzfsqt>

GBIF.org (11 June 2019). GBIF Occurrence Download Lurocalis semitorquatus (Gmelin, JF, 1789). Available in: https://doi.org/10.15468/dl.9h8uqy

GBIF.org (11 June 2019). GBIF Occurrence Download Nyctidromus albicollis (Gmelin, 1789). Available in: <https://doi.org/10.15468/dl.56zcuz>

GBIF.org (11 June 2019). GBIF Occurrence Download Nyctiphrynus mcleodii (Brewster, 1888). Available in: <https://doi.org/10.15468/dl.lhz0nw>

GBIF.org (11 June 2019). GBIF Occurrence Download Nyctiphrynus yucatanicus (Hartert, 1892). Available in: <https://doi.org/10.15468/dl.gniwlw>

GBIF.org (11 June 2019). GBIF Occurrence Download Setopagis heterura Todd, 1915. Available in: <https://doi.org/10.15468/dl.gg8jyk>

GBIF.org (11 June 2019). GBIF Occurrence Download Nyctibius griseus (Gmelin, JF, 1789). Available in: <https://doi.org/10.15468/dl.o1lnpd>

GBIF.org (11 June 2019). GBIF Occurrence Download Nyctibius jamaicensis (Gmelin, JF, 1789). Available in: <https://doi.org/10.15468/dl.cgs16i>

GBIF.org (11 June 2019). GBIF Occurrence Download Burhinus bistriatus (Wagler, 1829). Available in: <https://doi.org/10.15468/dl.3cbqax>

GBIF.org (11 June 2019). GBIF Occurrence Download Charadrius collaris Vieillot, 1818. Available in: <https://doi.org/10.15468/dl.oaqbd0>

GBIF.org (11 June 2019). GBIF Occurrence Download Charadrius wilsonia (Ord, 1814). Available in: <https://doi.org/10.15468/dl.0afn3u>

GBIF.org (11 June 2019). GBIF Occurrence Download Vanellus chilensis (Molina, 1782). Available in: <https://doi.org/10.15468/dl.namvuz>

GBIF.org (11 June 2019). GBIF Occurrence Download Jacana jacana (Linnaeus, 1766). Available in: <https://doi.org/10.15468/dl.o3bpbs>

GBIF.org (11 June 2019). GBIF Occurrence Download Jacana spinosa (Linnaeus, 1758). Available in: <https://doi.org/10.15468/dl.3r2xqe>

GBIF.org (11 June 2019). GBIF Occurrence Download Phaetusa simplex (Gmelin, JF, 1789). Available in: <https://doi.org/10.15468/dl.vignew>

GBIF.org (11 June 2019). GBIF Occurrence Download Sternula superciliaris (Vieillot, 1819). Available in: <https://doi.org/10.15468/dl.aiup0q>

GBIF.org (11 June 2019). GBIF Occurrence Download Himantopus mexicanus (Statius Müller, PL, 1776). Available in: <https://doi.org/10.15468/dl.rmak10>

GBIF.org (11 June 2019). GBIF Occurrence Download Gallinago undulata (Boddaert, 1783). Available in: <https://doi.org/10.15468/dl.ajp8ua>

GBIF.org (11 June 2019). GBIF Occurrence Download Dromococcyx phasianellus (von Spix, 1824). Available in: <https://doi.org/10.15468/dl.kbgqd3>

GBIF.org (11 June 2019). GBIF Occurrence Download Geococcyx velox (Wagner, 1836). Available in: <https://doi.org/10.15468/dl.r0evjj>

GBIF.org (11 June 2019). GBIF Occurrence Download Morococcyx erythropygus (Lesson, PA, 1842). Available in: <https://doi.org/10.15468/dl.bhdkco>

GBIF.org (11 June 2019). GBIF Occurrence Download Piaya cayana (Linnaeus, 1766). Available in: <https://doi.org/10.15468/dl.kpxwcl>

GBIF.org (11 June 2019). GBIF Occurrence Download Tapera naevia (Linnaeus, 1766). Available in: <https://doi.org/10.15468/dl.5nszbu>

GBIF.org (11 June 2019). GBIF Occurrence Download Caracara cheriway (Jacquin, 1784). Available in: <https://doi.org/10.15468/dl.3mpobw>

GBIF.org (11 June 2019). GBIF Occurrence Download Falco femoralis Temminck, 1822. Available in: <https://doi.org/10.15468/dl.uvwtil>

GBIF.org (11 June 2019). GBIF Occurrence Download Falco rufigularis Daudin, 1800. Available in: <https://doi.org/10.15468/dl.deloyy>

GBIF.org (11 June 2019). GBIF Occurrence Download Falco sparverius Linnaeus, 1758. Available in: <https://doi.org/10.15468/dl.3s1f8w>

GBIF.org (11 June 2019). GBIF Occurrence Download Herpetotheres cachinnans (Linnaeus, 1758). Available in: <https://doi.org/10.15468/dl.aiosxr>

GBIF.org (11 June 2019). GBIF Occurrence Download Micrastur ruficollis (Vieillot, 1817). Available in: <https://doi.org/10.15468/dl.e4j0sf>

GBIF.org (11 June 2019). GBIF Occurrence Download Micrastur semitorquatus (Vieillot, 1817). Available in: <https://doi.org/10.15468/dl.fmx9gs>

GBIF.org (11 June 2019). GBIF Occurrence Download Milvago chimachima (Vieillot, 1816). Available in: <https://doi.org/10.15468/dl.fjscyk>

GBIF.org (11 June 2019). GBIF Occurrence Download Crax alberti Fraser, 1852. Available in: <https://doi.org/10.15468/dl.nwe4vz>

GBIF.org (11 June 2019). GBIF Occurrence Download Crax daubentoni Gray, GR, 1867. Available in: <https://doi.org/10.15468/dl.6virue>

GBIF.org (11 June 2019). GBIF Occurrence Download Crax rubra Linnaeus, 1758. Available in: <https://doi.org/10.15468/dl.s5vqbh>

GBIF.org (11 June 2019). GBIF Occurrence Download Myiarchus apicalis Sclater & Salvin, 1881. Available in: <https://doi.org/10.15468/dl.y5eyic>

GBIF.org (11 June 2019). GBIF Occurrence Download Myiarchus ferox (Gmelin, JF, 1789). Available in: <https://doi.org/10.15468/dl.sszis7>

GBIF.org (11 June 2019). GBIF Occurrence Download Myiarchus nuttingi Ridgway, 1882. Available in: <https://doi.org/10.15468/dl.vgmewj>

GBIF.org (11 June 2019). GBIF Occurrence Download Myiarchus panamensis Lawrence, 1861. Available in: <https://doi.org/10.15468/dl.zkgdos>

GBIF.org (11 June 2019). GBIF Occurrence Download Myiarchus sagrae (Gundlach, 1852). Available in: <https://doi.org/10.15468/dl.eo6h6n>

GBIF.org (11 June 2019). GBIF Occurrence Download Myiarchus stolidus (Gosse, 1847). Available in: <https://doi.org/10.15468/dl.cbef5y>

GBIF.org (11 June 2019). GBIF Occurrence Download Myiarchus tuberculifer d'Orbigny & Lafresnaye, 1837. Available in: <https://doi.org/10.15468/dl.iwlosz>

GBIF.org (11 June 2019). GBIF Occurrence Download Myiarchus tyrannulus (Statius Müller, PL, 1776). Available in: <https://doi.org/10.15468/dl.uldpga>

GBIF.org (11 June 2019). GBIF Occurrence Download Myiarchus venezuelensis Lawrence, 1865. Available in: <https://doi.org/10.15468/dl.ox4wnx>

GBIF.org (11 June 2019). GBIF Occurrence Download Myiarchus yucatanensis Lawrence, 1871. Available in: <https://doi.org/10.15468/dl.eudoek>

GBIF.org (11 June 2019). GBIF Occurrence Download Myiobius atricaudus (Lawrence, 1863). Available in: <https://doi.org/10.15468/dl.ogeqph>

GBIF.org (11 June 2019). GBIF Occurrence Download Myiobius sulphureipygius (Sclater, PL, 1857). Available in: <https://doi.org/10.15468/dl.tdi1ys>

GBIF.org (11 June 2019). GBIF Occurrence Download Myiodynastes maculatus (Statius Müller, PL, 1776). Available in: <https://doi.org/10.15468/dl.qplzj6>

GBIF.org (11 June 2019). GBIF Occurrence Download Myiopagis viridicata (Vieillot, 1817). Available in: <https://doi.org/10.15468/dl.a9ch6w>

GBIF.org (11 June 2019). GBIF Occurrence Download Myiophobus fasciatus (Statius Müller, PL, 1776). Available in: <https://doi.org/10.15468/dl.0iwkdz>

GBIF.org (11 June 2019). GBIF Occurrence Download Myiozetetes similis (von Spix, 1825). Available in: <https://doi.org/10.15468/dl.cp6q1x>

GBIF.org (11 June 2019). GBIF Occurrence Download Oncostoma cinereigulare (Sclater, PL, 1857). Available in: <https://doi.org/10.15468/dl.axrgqd>

GBIF.org (11 June 2019). GBIF Occurrence Download Oncostoma olivaceum (Lawrence, 1862). Available in: <https://doi.org/10.15468/dl.9gjgir>

GBIF.org (11 June 2019). GBIF Occurrence Download Phaeomyias murina (von Spix, 1825). Available in: <https://doi.org/10.15468/dl.mgriu5>

GBIF.org (11 June 2019). GBIF Occurrence Download Phelpsia inornata (Lawrence, 1869). Available in: <https://doi.org/10.15468/dl.u90l5t>

GBIF.org (11 June 2019). GBIF Occurrence Download Phyllomyias griseiceps (Sclater, PL & Salvin, 1871). Available in: <https://doi.org/10.15468/dl.uzirtj>

GBIF.org (11 June 2019). GBIF Occurrence Download Pitangus sulphuratus (Linnaeus, 1766). Available in: <https://doi.org/10.15468/dl.e84c2d>

GBIF.org (11 June 2019). GBIF Occurrence Download Platyrinchus cancrominus Sclater, PL & Salvin, 1860. Available in: <https://doi.org/10.15468/dl.dawxjv>

GBIF.org (11 June 2019). GBIF Occurrence Download Platyrinchus mystaceus Vieillot, 1818. Available in: <https://doi.org/10.15468/dl.rik44f>

GBIF.org (11 June 2019). GBIF Occurrence Download Poecilotriccus sylvia (Desmarest, 1806). Available in: <https://doi.org/10.15468/dl.hgbq3a>

GBIF.org (11 June 2019). GBIF Occurrence Download Ramphotrigon megacephalum (Swainson, 1835). Available in: <https://doi.org/10.15468/dl.kuhfuj>

GBIF.org (11 June 2019). GBIF Occurrence Download Rhynchocyclus brevirostris (Cabanis, 1847). Available in: <https://doi.org/10.15468/dl.zig7u2>

GBIF.org (11 June 2019). GBIF Occurrence Download Satrapa icterophrys (Vieillot, 1818). Available in: <https://doi.org/10.15468/dl.pqmvzd>

GBIF.org (11 June 2019). GBIF Occurrence Download Todirostrum cinereum (Linnaeus, 1766). Available in: <https://doi.org/10.15468/dl.jmedos>

GBIF.org (11 June 2019). GBIF Occurrence Download Todirostrum nigriceps Sclater, PL, 1855. Available in: <https://doi.org/10.15468/dl.9wwiow>

GBIF.org (11 June 2019). GBIF Occurrence Download Todirostrum viridanum Hellmayr, 1927. Available in: <https://doi.org/10.15468/dl.vtkniv>

GBIF.org (11 June 2019). GBIF Occurrence Download Tolmomyias flaviventris (zu Wied-Neuwied, 1831). Available in: <https://doi.org/10.15468/dl.sjqdhp>

GBIF.org (11 June 2019). GBIF Occurrence Download Tolmomyias sulphurescens (von Spix, 1825). Available in: <https://doi.org/10.15468/dl.ghcpvn>

GBIF.org (11 June 2019). GBIF Occurrence Download Tyrannus couchii Baird, SF, 1858. Available in: <https://doi.org/10.15468/dl.nw1rkn>

GBIF.org (11 June 2019). GBIF Occurrence Download Tyrannus crassirostris Swainson, 1826. Available in: <https://doi.org/10.15468/dl.ap3j5q>

GBIF.org (11 June 2019). GBIF Occurrence Download Tyrannus melancholicus Vieillot, 1819. Available in: <https://doi.org/10.15468/dl.fnttap>

GBIF.org (11 June 2019). GBIF Occurrence Download Tyrannus vociferans Swainson, 1826. Available in: <https://doi.org/10.15468/dl.logtjj>

GBIF.org (11 June 2019). GBIF Occurrence Download Xenotriccus callizonus Dwight & Griscom, 1927. Available in: <https://doi.org/10.15468/dl.syzxln>

GBIF.org (11 June 2019). GBIF Occurrence Download Xenotriccus mexicanus (Zimmer, JT, 1938). Available in: <https://doi.org/10.15468/dl.yu8gtz>

GBIF.org (11 June 2019). GBIF Occurrence Download Zimmerius parvus (Lawrence, 1862). Available in: <https://doi.org/10.15468/dl.4573is>

GBIF.org (11 June 2019). GBIF Occurrence Download Zimmerius vilissimus (Sclater, PL & Salvin, 1859). Available in: <https://doi.org/10.15468/dl.yizxqn>

GBIF.org (11 June 2019). GBIF Occurrence Download Cyclarhis gujanensis (Gmelin, JF, 1789). Available in: <https://doi.org/10.15468/dl.orcvz1>

GBIF.org (11 June 2019). GBIF Occurrence Download Hylophilus aurantiifrons Lawrence, 1861. Available in: <https://doi.org/10.15468/dl.ugjeok>

GBIF.org (11 June 2019). GBIF Occurrence Download Hylophilus decurtatus (Bonaparte, 1838). Available in: <https://doi.org/10.15468/dl.sbgp8p>

GBIF.org (11 June 2019). GBIF Occurrence Download Hylophilus flavipes Lafresnaye, 1845. Available in: <https://doi.org/10.15468/dl.vitf6y>

GBIF.org (11 June 2019). GBIF Occurrence Download Vireo bairdi Ridgway, 1885. Available in: <https://doi.org/10.15468/dl.nimiu1>

GBIF.org (11 June 2019). GBIF Occurrence Download Vireo brevipennis (Sclater, PL, 1858). Available in: <https://doi.org/10.15468/dl.qfpl0e>

GBIF.org (11 June 2019). GBIF Occurrence Download Vireo gundlachii Lembeye, 1850. Available in: <https://doi.org/10.15468/dl.zawd2w>

GBIF.org (11 June 2019). GBIF Occurrence Download Vireo hypochryseus Sclater, PL, 1863. Available in: <https://doi.org/10.15468/dl.fdkwcv>

GBIF.org (11 June 2019). GBIF Occurrence Download Vireo magister (Baird, SF, 1871). Available in: <https://doi.org/10.15468/dl.84x5fu>

GBIF.org (11 June 2019). GBIF Occurrence Download Vireo nanus (Lawrence, 1875). Available in: <https://doi.org/10.15468/dl.xujrt7>

GBIF.org (11 June 2019). GBIF Occurrence Download Vireo nelsoni Bond, 1934. Available in: <https://doi.org/10.15468/dl.hsm2ml>

GBIF.org (11 June 2019). GBIF Occurrence Download Vireo pallens Salvin, 1863. Available in: <https://doi.org/10.15468/dl.4v2qf0>

GBIF.org (11 June 2019). GBIF Occurrence Download Vireo plumbeus Coues, 1866. Available in: <https://doi.org/10.15468/dl.r2j7wc>

GBIF.org (12 June 2019). GBIF Occurrence Download Botaurus pinnatus (Wagler, 1829). Available in: <https://doi.org/10.15468/dl.ndz75o>

GBIF.org (12 June 2019). GBIF Occurrence Download Cochlearius cochlearius (Linnaeus, 1766). Available in: <https://doi.org/10.15468/dl.f2wpss>

GBIF.org (12 June 2019). GBIF Occurrence Download Jabiru mycteria (Lichtenstein, 1819). Available in: <https://doi.org/10.15468/dl.rig0ox>

GBIF.org (12 June 2019). GBIF Occurrence Download Claravis mondetoura (Bonaparte, 1856). Available in: <https://doi.org/10.15468/dl.gtufra>

GBIF.org (12 June 2019). GBIF Occurrence Download Claravis pretiosa (Ferrari-Pérez, 1886). Available in: <https://doi.org/10.15468/dl.eudmx4>

GBIF.org (12 June 2019). GBIF Occurrence Download Columbina inca (Lesson, R, 1847). Available in: <https://doi.org/10.15468/dl.eudmx4>

GBIF.org (12 June 2019). GBIF Occurrence Download Columbina minuta (Linnaeus, 1766). Available in: <https://doi.org/10.15468/dl.h6ijk6>

GBIF.org (12 June 2019). GBIF Occurrence Download Columbina passerina (Linnaeus, 1758). Available in: <https://doi.org/10.15468/dl.oorj1c>

GBIF.org (12 June 2019). GBIF Occurrence Download Columbina squammata (Lesson, R, 1831). Available in: <https://doi.org/10.15468/dl.5m3r1e>

GBIF.org (12 June 2019). GBIF Occurrence Download Columbina talpacoti (Temminck, 1810). Available in: <https://doi.org/10.15468/dl.dxfgm0>

GBIF.org (12 June 2019). GBIF Occurrence Download Geotrygon chrysia Bonaparte, 1855. Available in: <https://doi.org/10.15468/dl.aomi18>

GBIF.org (12 June 2019). GBIF Occurrence Download Geotrygon montana (Linnaeus, 1758). Available in: <https://doi.org/10.15468/dl.pryxqz>

GBIF.org (12 June 2019). GBIF Occurrence Download Geotrygon violacea (Temminck, 1809). Available in: <https://doi.org/10.15468/dl.6vtr35>

GBIF.org (12 June 2019). GBIF Occurrence Download Leptotila cassinii Lawrence, 1867. Available in: <https://doi.org/10.15468/dl.yp3gka>

GBIF.org (12 June 2019). GBIF Occurrence Download Leptotila jamaicensis (Linnaeus, 1766). Available in: <https://doi.org/10.15468/dl.qohvsj>

GBIF.org (12 June 2019). GBIF Occurrence Download Leptotila verreauxi Bonaparte, 1855. Available in: <https://doi.org/10.15468/dl.ynjmjb>

GBIF.org (12 June 2019). GBIF Occurrence Download Patagioenas cayennensis (Bonnaterre, 1792). Available in: <https://doi.org/10.15468/dl.tv2zrk>

GBIF.org (12 June 2019). GBIF Occurrence Download Patagioenas corensis (Jacquin, 1784). Available in: <https://doi.org/10.15468/dl.yhfrln>

GBIF.org (12 June 2019). GBIF Occurrence Download Patagioenas flavirostris (Wagler, 1831). Available in: <https://doi.org/10.15468/dl.m2wvil>

GBIF.org (12 June 2019). GBIF Occurrence Download Patagioenas inornata (Vigors, 1827). Available in: <https://doi.org/10.15468/dl.x11lkl>

GBIF.org (12 June 2019). GBIF Occurrence Download Patagioenas leucocephala (Linnaeus, 1758). Available in: <https://doi.org/10.15468/dl.lnhmdq>

GBIF.org (12 June 2019). GBIF Occurrence Download Patagioenas speciosa (Gmelin, JF, 1789). Available in: <https://doi.org/10.15468/dl.x9uowi>

GBIF.org (12 June 2019). GBIF Occurrence Download Patagioenas squamosa (Bonnaterre, 1792). Available in: <https://doi.org/10.15468/dl.vay1nr>

GBIF.org (12 June 2019). GBIF Occurrence Download Starnoenas cyanocephala (Linnaeus, 1758). Available in: <https://doi.org/10.15468/dl.2cndkj>

GBIF.org (12 June 2019). GBIF Occurrence Download Zenaida asiatica (Linnaeus, 1758). Available in: <https://doi.org/10.15468/dl.gcjfqu>

GBIF.org (12 June 2019). GBIF Occurrence Download Zenaida auriculata (Des Murs, 1847). Available in: <https://doi.org/10.15468/dl.g74u5j>

GBIF.org (12 June 2019). GBIF Occurrence Download Zenaida aurita (Temminck, 1809). Available in: <https://doi.org/10.15468/dl.kjbfif>

GBIF.org (12 June 2019). GBIF Occurrence Download Zentrygon albifacies (Sclater, PL, 1858). Available in: <https://doi.org/10.15468/dl.2lchxk>

GBIF.org (12 June 2019). GBIF Occurrence Download Zentrygon linearis (Prévost, 1843). Available in: <https://doi.org/10.15468/dl.wpvvep>

GBIF.org (12 June 2019). GBIF Occurrence Download Chloroceryle aenea (Pallas, 1764). Available in: <https://doi.org/10.15468/dl.gxktbr>

GBIF.org (12 June 2019). GBIF Occurrence Download Chloroceryle amazona (Latham, 1790). Available in: <https://doi.org/10.15468/dl.1irpci>

GBIF.org (12 June 2019). GBIF Occurrence Download Megaceryle torquata (Linnaeus, 1766). Available in: <https://doi.org/10.15468/dl.4lvhid>

GBIF.org (12 June 2019). GBIF Occurrence Download Eumomota superciliosa (Sandbach, 1837). Available in: <https://doi.org/10.15468/dl.izumls>

GBIF.org (12 June 2019). GBIF Occurrence Download Hylomanes momotula Lichtenstein, MHK, 1839. Available in: <https://doi.org/10.15468/dl.vo3tsk>

GBIF.org (12 June 2019). GBIF Occurrence Download Momotus lessonii Lesson, 1842. Available in: <https://doi.org/10.15468/dl.uubhdu>

GBIF.org (12 June 2019). GBIF Occurrence Download Momotus mexicanus Swainson, 1827. Available in: <https://doi.org/10.15468/dl.a56tui>

GBIF.org (12 June 2019). GBIF Occurrence Download Momotus subrufescens Sclater, PL, 1853. Available in: <https://doi.org/10.15468/dl.btttfl>

GBIF.org (12 June 2019). GBIF Occurrence Download Todus angustirostris Lafresnaye, 1851. Available in: <https://doi.org/10.15468/dl.s9nyil>

GBIF.org (12 June 2019). GBIF Occurrence Download Todus multicolor Gould, 1837. Available in: <https://doi.org/10.15468/dl.rv3esx>

GBIF.org (12 June 2019). GBIF Occurrence Download Todus subulatus Gray, GR, 1847. Available in: <https://doi.org/10.15468/dl.4efhkg>

GBIF.org (12 June 2019). GBIF Occurrence Download Coccycua pumila (Strickland, 1852). Available in: <https://doi.org/10.15468/dl.hptuda>

GBIF.org (12 June 2019). GBIF Occurrence Download Coccyzus lansbergi Bonaparte, 1850. Available in: <https://doi.org/10.15468/dl.s4gzun>

GBIF.org (12 June 2019). GBIF Occurrence Download Coccyzus longirostris (Hermann, 1783). Available in: <https://doi.org/10.15468/dl.7huwqb>

GBIF.org (12 June 2019). GBIF Occurrence Download Coccyzus melacoryphus Vieillot, 1817. Available in: <https://doi.org/10.15468/dl.pncsvl>

GBIF.org (12 June 2019). GBIF Occurrence Download Coccyzus merlini d'Orbigny, 1839. Available in: <https://doi.org/10.15468/dl.h0j4yh>

GBIF.org (12 June 2019). GBIF Occurrence Download Coccyzus minor (Gmelin, JF, 1788). Available in: <https://doi.org/10.15468/dl.nbmbku>

GBIF.org (12 June 2019). GBIF Occurrence Download Crotophaga ani Linnaeus, 1758. Available in: <https://doi.org/10.15468/dl.nbmbku>

GBIF.org (12 June 2019). GBIF Occurrence Download Crotophaga major Gmelin, JF, 1788. Available in: <https://doi.org/10.15468/dl.c4gelr>

GBIF.org (12 June 2019). GBIF Occurrence Download Crotophaga sulcirostris Swainson, 1827. Available in: <https://doi.org/10.15468/dl.k0qlqc>

GBIF.org (12 June 2019). GBIF Occurrence Download Dromococcyx pavoninus Pelzeln, 1870. Available in: <https://doi.org/10.15468/dl.llwgqi>

GBIF.org (12 June 2019). GBIF Occurrence Download Ortalis columbiana Hellmayr, 1906. Available in: <https://doi.org/10.15468/dl.qzhcku>

GBIF.org (12 June 2019). GBIF Occurrence Download Ortalis garrula (von Humboldt, 1805). Available in: <https://doi.org/10.15468/dl.ceknyx>

GBIF.org (12 June 2019). GBIF Occurrence Download Ortalis leucogastra (Gould, 1843). Available in: <https://doi.org/10.15468/dl.ceknyx>

GBIF.org (12 June 2019). GBIF Occurrence Download Ortalis poliocephala (Wagler, 1830). Available in: <https://doi.org/10.15468/dl.yqbuh6>

GBIF.org (12 June 2019). GBIF Occurrence Download Ortalis ruficauda Jardine, 1847. Available in: <https://doi.org/10.15468/dl.kafapo>

GBIF.org (12 June 2019). GBIF Occurrence Download Ortalis vetula (Wagler, 1830). Available in: <https://doi.org/10.15468/dl.atmxm9>

GBIF.org (12 June 2019). GBIF Occurrence Download Ortalis wagleri Gray, GR, 1867. Available in: <https://doi.org/10.15468/dl.u962m5>

GBIF.org (12 June 2019). GBIF Occurrence Download Pauxi pauxi (Linnaeus, 1766). Available in: <https://doi.org/10.15468/dl.cuj5xc>

GBIF.org (12 June 2019). GBIF Occurrence Download Penelope argyrotis (Bonaparte, 1856). Available in: <https://doi.org/10.15468/dl.6ddlwt>

GBIF.org (12 June 2019). GBIF Occurrence Download Penelope purpurascens Wagler, 1830. Available in: <https://doi.org/10.15468/dl.2yegnh>

GBIF.org (12 June 2019). GBIF Occurrence Download Penelopina nigras (Fraser, 1852) . Available in: <https://doi.org/10.15468/dl.ujwl16>

GBIF.org (12 June 2019). GBIF Occurrence Download Meleagris ocellata Cuvier, 1820. Available in: <https://doi.org/10.15468/dl.crtlks>

GBIF.org (12 June 2019). GBIF Occurrence Download Callipepla douglasii (Vigors, 1829). Available in: <https://doi.org/10.15468/dl.jedkwl>

GBIF.org (12 June 2019). GBIF Occurrence Download Colinus cristatus (Linnaeus, 1766). Available in: <https://doi.org/10.15468/dl.e8auty>

GBIF.org (12 June 2019). GBIF Occurrence Download Colinus nigrogularis (Gould, 1843). Available in: <https://doi.org/10.15468/dl.alfvhj>

GBIF.org (12 June 2019). GBIF Occurrence Download Cyrtonyx montezumae (Vigors, 1830). Available in: <https://doi.org/10.15468/dl.zi9x4v>

GBIF.org (12 June 2019). GBIF Occurrence Download Cyrtonyx ocellatus (Gould, 1837). Available in: <https://doi.org/10.15468/dl.jtqdwo>

GBIF.org (12 June 2019). GBIF Occurrence Download Dactylortyx thoracicus (Gambel, 1848). Available in: <https://doi.org/10.15468/dl.du1tzy>

GBIF.org (12 June 2019). GBIF Occurrence Download Philortyx fasciatus (Gould, 1844). Available in: <https://doi.org/10.15468/dl.ocu1fx>

GBIF.org (12 June 2019). GBIF Occurrence Download Aramides albiventris Lawrence, 1868. Available in: <https://doi.org/10.15468/dl.vbymdr>

GBIF.org (12 June 2019). GBIF Occurrence Download Aramides axillaris Lawrence, 1863. Available in: <https://doi.org/10.15468/dl.tthqpd>

GBIF.org (12 June 2019). GBIF Occurrence Download Aramides cajaneus (Statius Müller, PL, 1776). Available in: <https://doi.org/10.15468/dl.odt8pm>

GBIF.org (12 June 2019). GBIF Occurrence Download Laterallus albigularis (Lawrence, 1861). Available in: <https://doi.org/10.15468/dl.ygcjh7>

GBIF.org (12 June 2019). GBIF Occurrence Download Neocrex erythrops (Sclater, PL, 1867). Available in: <https://doi.org/10.15468/dl.hpuvpv>

GBIF.org (12 June 2019). GBIF Occurrence Download Pardirallus maculatus (Boddaert, 1783). Available in: <https://doi.org/10.15468/dl.3wmjr6>

GBIF.org (12 June 2019). GBIF Occurrence Download Pardirallus nigricans (Vieillot, 1819). Available in: <https://doi.org/10.15468/dl.qpa3jo>

GBIF.org (12 June 2019). GBIF Occurrence Download Porzana albicollis (Vieillot, 1819). Available in: <https://doi.org/10.15468/dl.18a5eo>

GBIF.org (12 June 2019). GBIF Occurrence Download Porzana flaviventer (Boddaert, 1783). Available in: <https://doi.org/10.15468/dl.ece6fm>

GBIF.org (12 June 2019). GBIF Occurrence Download Rallus longirostris Boddaert, 1783. Available in: <https://doi.org/10.15468/dl.bojbpl>

GBIF.org (12 June 2019). GBIF Occurrence Download Rallus obsoletus Ridgway, 1874. Available in: <https://doi.org/10.15468/dl.mnee1m>

GBIF.org (12 June 2019). GBIF Occurrence Download Rallus tenuirostris Ridgway, 1874. Available in: <https://doi.org/10.15468/dl.03glpx>

GBIF.org (12 June 2019). GBIF Occurrence Download Rallus wetmorei Zimmer, JT & Phelps, 1944. Available in: <https://doi.org/10.15468/dl.0qn2rj>

GBIF.org (12 June 2019). GBIF Occurrence Download Ardea alba Linnaeus, 1758. Available in: <https://doi.org/10.15468/dl.dudwu7>

GBIF.org (12 June 2019). GBIF Occurrence Download Butorides striata (Linnaeus, 1758). Available in: <https://doi.org/10.15468/dl.amsbk9>

GBIF.org (12 June 2019). GBIF Occurrence Download Butorides virescens (Linnaeus, 1758). Available in: <https://doi.org/10.15468/dl.rnmh8j>

GBIF.org (12 June 2019). GBIF Occurrence Download Ixobrychus involucris (Vieillot, 1823). Available in: <https://doi.org/10.15468/dl.dy1u8p>

GBIF.org (12 June 2019). GBIF Occurrence Download Tigrisoma lineatum (Boddaert, 1783). Available in: <https://doi.org/10.15468/dl.qlep8l>

GBIF.org (12 June 2019). GBIF Occurrence Download Tigrisoma mexicanum Swainson, 1834. Available in: <https://doi.org/10.15468/dl.odfarm>

GBIF.org (12 June 2019). GBIF Occurrence Download Phalacrocorax brasilianus (Gmelin, JF, 1789). Available in: <https://doi.org/10.15468/dl.aejmhk>

GBIF.org (12 June 2019). GBIF Occurrence Download Cyanocompsa parellina (Bonaparte, 1850). Available in: <https://doi.org/10.15468/dl.nambdh>

GBIF.org (13 June 2019). GBIF Occurrence Download Eudocimus albus (Linnaeus, 1758). Available in: <https://doi.org/10.15468/dl.v6ty55>

GBIF.org (13 June 2019). GBIF Occurrence Download Eudocimus ruber (Linnaeus, 1758). Available in: <https://doi.org/10.15468/dl.xnrdnz>

GBIF.org (13 June 2019). GBIF Occurrence Download Mesembrinibis cayennensis (Gmelin, JF, 1789). Available in: <https://doi.org/10.15468/dl.obivee>

GBIF.org (13 June 2019). GBIF Occurrence Download Phimosus infuscatus (Lichtenstein, MHK, 1823). Available in: <https://doi.org/10.15468/dl.rzphxx>

GBIF.org (13 June 2019). GBIF Occurrence Download Theristicus caudatus (Boddaert, 1783). Available in: <https://doi.org/10.15468/dl.ndn6no>

GBIF.org (13 June 2019). GBIF Occurrence Download Anhinga anhinga (Linnaeus, 1766). Available in: <https://doi.org/10.15468/dl.9ufsti>

GBIF.org (13 June 2019). GBIF Occurrence Download Amazona albifrons (Sparrman, 1788). Available in: <https://doi.org/10.15468/dl.fr8fik>

GBIF.org (13 June 2019). GBIF Occurrence Download Amazona auropalliata (Lesson, 1842). Available in: <https://doi.org/10.15468/dl.iqhknx>

GBIF.org (13 June 2019). GBIF Occurrence Download Amazona autumnalis (Linnaeus, 1758). Available in: <https://doi.org/10.15468/dl.ggdkqa>

GBIF.org (13 June 2019). GBIF Occurrence Download Amazona barbadensis (Gmelin, JF, 1788). Available in: <https://doi.org/10.15468/dl.tfrljc>

GBIF.org (13 June 2019). GBIF Occurrence Download Amazona finschi (Sclater, PL, 1864). Available in: <https://doi.org/10.15468/dl.mzeujv>

GBIF.org (13 June 2019). GBIF Occurrence Download Amazona leucocephala Linnaeus, 1758. Available in: <https://doi.org/10.15468/dl.lulwqx>

GBIF.org (13 June 2019). GBIF Occurrence Download Amazona oratrix Ridgway, 1887. Available in: <https://doi.org/10.15468/dl.so7tzu>

GBIF.org (13 June 2019). GBIF Occurrence Download Amazona ventralis (Müller, 1776). Available in: <https://doi.org/10.15468/dl.0ugrnp>

GBIF.org (13 June 2019). GBIF Occurrence Download Amazona xantholora (Gray, GR, 1859). Available in: <https://doi.org/10.15468/dl.xmcqys>

GBIF.org (13 June 2019). GBIF Occurrence Download Ara chloropterus Gray, GR, 1859. Available in: <https://doi.org/10.15468/dl.5a13y8>

GBIF.org (13 June 2019). GBIF Occurrence Download Ara militaris (Linnaeus, 1766). Available in: <https://doi.org/10.15468/dl.pl7va9>

GBIF.org (13 June 2019). GBIF Occurrence Download Brotogeris jugularis (Müller, 1776). Available in: <https://doi.org/10.15468/dl.9n6e7t>

GBIF.org (13 June 2019). GBIF Occurrence Download Eupsittula canicularis (Linnaeus, 1758). Available in: <https://doi.org/10.15468/dl.7yfbwp>

GBIF.org (13 June 2019). GBIF Occurrence Download Eupsittula nana (Vigors, 1830). Available in: <https://doi.org/10.15468/dl.lrddyp>

GBIF.org (13 June 2019). GBIF Occurrence Download Eupsittula pertinax (Linnaeus, 1758). Available in: <https://doi.org/10.15468/dl.e1sogt>

GBIF.org (13 June 2019). GBIF Occurrence Download Forpus conspicillatus (Lafresnaye, 1848). Available in: <https://doi.org/10.15468/dl.l20tln>

GBIF.org (13 June 2019). GBIF Occurrence Download Forpus cyanopygius (Souancé, 1856). Available in: <https://doi.org/10.15468/dl.krsxrb>

GBIF.org (13 June 2019). GBIF Occurrence Download Forpus passerinus (Linnaeus, 1758). Available in: <https://doi.org/10.15468/dl.4jml44>

GBIF.org (13 June 2019). GBIF Occurrence Download Forpus xanthopterygius (von Spix, 1824). Available in: <https://doi.org/10.15468/dl.pzedoi>

GBIF.org (13 June 2019). GBIF Occurrence Download Pionus senilis (von Spix, 1824). Available in: <https://doi.org/10.15468/dl.jg0xfr>

GBIF.org (13 June 2019). GBIF Occurrence Download Psittacara chloropterus (Souancé, 1856). Available in: <https://doi.org/10.15468/dl.bdtou6>

GBIF.org (13 June 2019). GBIF Occurrence Download Psittacara euops (Wagler, 1832). Available in: <https://doi.org/10.15468/dl.zotyru>

GBIF.org (13 June 2019). GBIF Occurrence Download Psittacara holochlorus (Sclater, PL, 1859). Available in: <https://doi.org/10.15468/dl.t0zyee>

GBIF.org (13 June 2019). GBIF Occurrence Download Psittacara strenuus (Ridgway, 1915). Available in: <https://doi.org/10.15468/dl.euqvwu>

GBIF.org (13 June 2019). GBIF Occurrence Download Pyrilia pyrilia (Bonaparte, 1853). Available in: <https://doi.org/10.15468/dl.c6sdp7>

GBIF.org (13 June 2019). GBIF Occurrence Download Pyrrhura picta (Müller, 1776). Available in: <https://doi.org/10.15468/dl.lh218d>

GBIF.org (13 June 2019). GBIF Occurrence Download Thectocercus acuticaudatus (Vieillot, 1818). Available in: <https://doi.org/10.15468/dl.dfpzdk>

GBIF.org (13 June 2019). GBIF Occurrence Download Touit batavicus (Boddaert, 1783). Available in: <https://doi.org/10.15468/dl.wmrscm>

GBIF.org (13 June 2019). GBIF Occurrence Download Crypturellus cinnamomeus (Lesson, PA, 1842). Available in: <https://doi.org/10.15468/dl.t3l6fy>

GBIF.org (13 June 2019). GBIF Occurrence Download Crypturellus erythropus (Pelzeln, 1863). Available in: <https://doi.org/10.15468/dl.stqd2b>

GBIF.org (13 June 2019). GBIF Occurrence Download Crypturellus obsoletus (Temminck, 1815). Available in: <https://doi.org/10.15468/dl.nifeio>

GBIF.org (13 June 2019). GBIF Occurrence Download Priotelus temnurus (Temminck, 1825). Available in: <https://doi.org/10.15468/dl.eg3sfo>

GBIF.org (13 June 2019). GBIF Occurrence Download Trogon caligatus Gould, 1838. Available in: <https://doi.org/10.15468/dl.bquig4>

GBIF.org (13 June 2019). GBIF Occurrence Download Trogon citreolus Gould, 1835. Available in: <https://doi.org/10.15468/dl.wvi48d>

GBIF.org (13 June 2019). GBIF Occurrence Download Trogon collaris Gould, 1845. Available in: <https://doi.org/10.15468/dl.qhel3e>

GBIF.org (13 June 2019). GBIF Occurrence Download Trogon elegans Gould, 1834. Available in: <https://doi.org/10.15468/dl.peykw5>

GBIF.org (13 June 2019). GBIF Occurrence Download Trogon massena Gould, 1838. Available in: <https://doi.org/10.15468/dl.23invj>

GBIF.org (13 June 2019). GBIF Occurrence Download Trogon melanocephalus Gould, 1836. Available in: <https://doi.org/10.15468/dl.4pa1ow>

GBIF.org (13 June 2019). GBIF Occurrence Download Trogon mexicanus Swainson, 1827. Available in: <https://doi.org/10.15468/dl.bkwndf>

GBIF.org (13 June 2019). GBIF Occurrence Download Asio stygius (Wagler, 1832). Available in: <https://doi.org/10.15468/dl.q8wwnq>

GBIF.org (13 June 2019). GBIF Occurrence Download Athene cunicularia (Molina, 1782). Available in: <https://doi.org/10.15468/dl.lsnvpf>

GBIF.org (13 June 2019). GBIF Occurrence Download Glaucidium brasilianum (Gmelin, JF, 1788). Available in: <https://doi.org/10.15468/dl.xwr0cv>

GBIF.org (13 June 2019). GBIF Occurrence Download Glaucidium gnoma Wagler, 1832. Available in: <https://doi.org/10.15468/dl.vmh02b>

GBIF.org (13 June 2019). GBIF Occurrence Download Glaucidium palmarum Nelson, 1901. Available in: <https://doi.org/10.15468/dl.ohap6z>

GBIF.org (13 June 2019). GBIF Occurrence Download Glaucidium siju (d'Orbigny, 1839). Available in: <https://doi.org/10.15468/dl.ptdcok>

GBIF.org (13 June 2019). GBIF Occurrence Download Margarobyas lawrencii P.L. Sclater & Salvin, 1868. Available in: <https://doi.org/10.15468/dl.dymx5m>

GBIF.org (13 June 2019). GBIF Occurrence Download Megascops choliba (Vieillot, 1817). Available in: <https://doi.org/10.15468/dl.loeni7>

GBIF.org (13 June 2019). GBIF Occurrence Download Megascops cooperi (Ridgway, 1878). Available in: <https://doi.org/10.15468/dl.xogqev>

GBIF.org (13 June 2019). GBIF Occurrence Download Megascops seductus (Moore, RT, 1941). Available in: <https://doi.org/10.15468/dl.7c7vu9>

GBIF.org (13 June 2019). GBIF Occurrence Download Megascops trichopsis (Wagler, 1832). Available in: <https://doi.org/10.15468/dl.xd41fn>

GBIF.org (13 June 2019). GBIF Occurrence Download Pseudoscops clamator (Vieillot, 1808). Available in: <https://doi.org/10.15468/dl.chlbuz>

GBIF.org (13 June 2019). GBIF Occurrence Download Pulsatrix perspicillata (Latham, 1790). Available in: <https://doi.org/10.15468/dl.xlo4dv>

GBIF.org (13 June 2019). GBIF Occurrence Download Strix nigrolineata (Sclater, 1859). Available in: <https://doi.org/10.15468/dl.qrfinw>

GBIF.org (13 June 2019). GBIF Occurrence Download Strix virgata (Cassin, 1849). Available in: <https://doi.org/10.15468/dl.qn7vcw>

GBIF.org (13 June 2019). GBIF Occurrence Download Tyto glaucops (Kaup, 1852). Available in: <https://doi.org/10.15468/dl.feynex>

GBIF.org (13 June 2019). GBIF Occurrence Download Hypnelus ruficollis (Wagler, 1829). Available in: <https://doi.org/10.15468/dl.7juldt>

GBIF.org (13 June 2019). GBIF Occurrence Download Brachygalba goeringi Sclater & Salvin, 1869. Available in: <https://doi.org/10.15468/dl.jqli11>

GBIF.org (13 June 2019). GBIF Occurrence Download Galbula ruficauda Cuvier, 1816. Available in: <https://doi.org/10.15468/dl.m7rvez>

GBIF.org (13 June 2019). GBIF Occurrence Download Campephilus guatemalensis (Hartlaub, 1844). Available in: <https://doi.org/10.15468/dl.wsqyv7>

GBIF.org (13 June 2019). GBIF Occurrence Download Campephilus melanoleucos (Gmelin, JF, 1788). Available in: <https://doi.org/10.15468/dl.waqbhg>

GBIF.org (13 June 2019). GBIF Occurrence Download Colaptes auricularis (Salvin & Godman, 1889). Available in: <https://doi.org/10.15468/dl.l6tz4h>

GBIF.org (13 June 2019). GBIF Occurrence Download Colaptes chrysoides (Malherbe, 1852). Available in: <https://doi.org/10.15468/dl.ccafxz>

GBIF.org (13 June 2019). GBIF Occurrence Download Colaptes punctigula (Boddaert, 1783). Available in: <https://doi.org/10.15468/dl.vcluzl>

GBIF.org (13 June 2019). GBIF Occurrence Download Colaptes rubiginosus (Swainson, 1820). Available in: <https://doi.org/10.15468/dl.7qlchf>

GBIF.org (13 June 2019). GBIF Occurrence Download Dryobates scalaris (Wagler, 1829). Available in: <https://doi.org/10.15468/dl.ntle8o>

GBIF.org (13 June 2019). GBIF Occurrence Download Dryocopus lineatus (Linnaeus, 1766). Available in: <https://doi.org/10.15468/dl.jqpsdx>

GBIF.org (13 June 2019). GBIF Occurrence Download Leuconotopicus arizonae (Hargitt, 1886). Available in: <https://doi.org/10.15468/dl.q32aa7>

GBIF.org (13 June 2019). GBIF Occurrence Download Leuconotopicus fumigatus (d'Orbigny, 1840). Available in: <https://doi.org/10.15468/dl.t6tsop>

GBIF.org (13 June 2019). GBIF Occurrence Download Melanerpes chrysogenys (Vigors, 1839). Available in: <https://doi.org/10.15468/dl.ui6ona>

GBIF.org (13 June 2019). GBIF Occurrence Download Melanerpes hoffmannii (Cabanis, 1862). Available in: <https://doi.org/10.15468/dl.xuxvhw>

GBIF.org (13 June 2019). GBIF Occurrence Download Melanerpes hypopolius (Wagler, 1829). Available in: <https://doi.org/10.15468/dl.lnxzwl>

GBIF.org (13 June 2019). GBIF Occurrence Download Melanerpes pucherani (Malherbe, 1849). Available in: <https://doi.org/10.15468/dl.gjmrop>

GBIF.org (13 June 2019). GBIF Occurrence Download Melanerpes pygmaeus (Ridgway, 1885). Available in: <https://doi.org/10.15468/dl.wok6f6>

GBIF.org (13 June 2019). GBIF Occurrence Download Melanerpes rubricapillus (Cabanis, 1862). Available in: <https://doi.org/10.15468/dl.1y8dgx>

GBIF.org (13 June 2019). GBIF Occurrence Download Melanerpes striatus (Statius Müller, PL, 1776). Available in: <https://doi.org/10.15468/dl.6syv3t>

GBIF.org (13 June 2019). GBIF Occurrence Download Melanerpes superciliaris (Temminck, 1827). Available in: <https://doi.org/10.15468/dl.wenvro>

GBIF.org (13 June 2019). GBIF Occurrence Download Melanerpes uropygialis (Baird, SF, 1854). Available in: <https://doi.org/10.15468/dl.gooc0g>

GBIF.org (13 June 2019). GBIF Occurrence Download Nesoctites micromegas (Sundevall, 1866). Available in: <https://doi.org/10.15468/dl.mkxqnz>

GBIF.org (13 June 2019). GBIF Occurrence Download Piculus chrysochloros (Vieillot, 1818). Available in: <https://doi.org/10.15468/dl.fetjck>

GBIF.org (13 June 2019). GBIF Occurrence Download Picumnus cinnamomeus Wagler, 1829. Available in: <https://doi.org/10.15468/dl.zievdh>

GBIF.org (13 June 2019). GBIF Occurrence Download Picumnus granadensis Lafresnaye, 1847. Available in: <https://doi.org/10.15468/dl.mey8st>

GBIF.org (13 June 2019). GBIF Occurrence Download Picumnus olivaceus Lafresnaye, 1845. Available in: <https://doi.org/10.15468/dl.umzchn>

GBIF.org (13 June 2019). GBIF Occurrence Download Picumnus squamulatus Lafresnaye, 1854. Available in: <https://doi.org/10.15468/dl.khr8b5>

GBIF.org (13 June 2019). GBIF Occurrence Download Veniliornis kirkii (Malherbe, 1845). Available in: <https://doi.org/10.15468/dl.2stveg>

GBIF.org (13 June 2019). GBIF Occurrence Download Xiphidiopicus percussus (Temminck, 1826). Available in: <https://doi.org/10.15468/dl.qdyion>

GBIF.org (13 June 2019). GBIF Occurrence Download Pteroglossus torquatus (Gmelin, JF, 1788). Available in: <https://doi.org/10.15468/dl.7ewuw4>

GBIF.org (14 June 2019). GBIF Occurrence Download Ramphastos sulfuratus Lesson, R, 1830. Available in: <https://doi.org/10.15468/dl.gi3oya>

GBIF.org (14 June 2019). GBIF Occurrence Download Psaltriparus minimus (Townsend, JK, 1837). Available in: <https://doi.org/10.15468/dl.j4lvun>

GBIF.org (14 June 2019). GBIF Occurrence Download Amaurospiza concolor Cabanis, 1861. Available in: <https://doi.org/10.15468/dl.a6fs2l>

GBIF.org (14 June 2019). GBIF Occurrence Download Cardinalis phoeniceus Bonaparte, 1838. Available in: <https://doi.org/10.15468/dl.wncrwx>

GBIF.org (14 June 2019). GBIF Occurrence Download Cyanocompsa brissonii (Lichtenstein, MHK, 1823). Available in: <https://doi.org/10.15468/dl.ofldoi>

GBIF.org (14 June 2019). GBIF Occurrence Download Granatellus sallaei (Bonaparte, 1856). Available in: <https://doi.org/10.15468/dl.xh0mhn>

GBIF.org (14 June 2019). GBIF Occurrence Download Granatellus venustus Bonaparte, 1850. Available in: <https://doi.org/10.15468/dl.sv1gw9>

GBIF.org (14 June 2019). GBIF Occurrence Download Habia fuscicauda (Cabanis, 1861). Available in: <https://doi.org/10.15468/dl.qv4x0b>

GBIF.org (14 June 2019). GBIF Occurrence Download Habia rubica (Vieillot, 1817). Available in: <https://doi.org/10.15468/dl.s5i6x7>

GBIF.org (14 June 2019). GBIF Occurrence Download Passerina leclancherii Lafresnaye, 1840. Available in: <https://doi.org/10.15468/dl.jkg9bt>

GBIF.org (14 June 2019). GBIF Occurrence Download Passerina rositae (Lawrence, 1874). Available in: <https://doi.org/10.15468/dl.hktscm>

GBIF.org (14 June 2019). GBIF Occurrence Download Passerina versicolor (Bonaparte, 1838). Available in: <https://doi.org/10.15468/dl.lpqrgt>

GBIF.org (14 June 2019). GBIF Occurrence Download Pheucticus chrysogaster (Lesson, R, 1832). Available in: <https://doi.org/10.15468/dl.uj0add>

GBIF.org (14 June 2019). GBIF Occurrence Download Pheucticus chrysopeplus (Vigors, 1832). Available in: <https://doi.org/10.15468/dl.n46wbo>

GBIF.org (14 June 2019). GBIF Occurrence Download Piranga bidentata Swainson, 1827. Available in: <https://doi.org/10.15468/dl.toj1s3>

GBIF.org (14 June 2019). GBIF Occurrence Download Piranga erythrocephala (Swainson, 1827). Available in: <https://doi.org/10.15468/dl.32vnr8>

GBIF.org (14 June 2019). GBIF Occurrence Download Piranga flava (Vieillot, 1822). Available in: <https://doi.org/10.15468/dl.h0pbbs>

GBIF.org (14 June 2019). GBIF Occurrence Download Piranga leucoptera (Trudeau, 1840). Available in: <https://doi.org/10.15468/dl.ulchnm>

GBIF.org (14 June 2019). GBIF Occurrence Download Piranga roseogularis Cabot, S, 1846. Available in: <https://doi.org/10.15468/dl.3cqsis>

GBIF.org (14 June 2019). GBIF Occurrence Download Coereba flaveola (Linnaeus, 1758). Available in: <https://doi.org/10.15468/dl.lwq8e2>

GBIF.org (14 June 2019). GBIF Occurrence Download Aphelocoma californica (Vigors, 1839). Available in: <https://doi.org/10.15468/dl.vcbfhc>

GBIF.org (14 June 2019). GBIF Occurrence Download Aphelocoma ultramarina (Bonaparte, 1825). Available in: <https://doi.org/10.15468/dl.pwyfmp>

GBIF.org (14 June 2019). GBIF Occurrence Download Calocitta colliei (Vigors, 1829). Available in: <https://doi.org/10.15468/dl.8utmay>

GBIF.org (14 June 2019). GBIF Occurrence Download Calocitta formosa (Swainson, 1827). Available in: <https://doi.org/10.15468/dl.o4ybuw>

GBIF.org (14 June 2019). GBIF Occurrence Download Corvus corax (Wagler, 1829). Available in: <https://doi.org/10.15468/dl.7h7c9i>

GBIF.org (14 June 2019). GBIF Occurrence Download Corvus leucognaphalus Daudin, 1800. Available in: <https://doi.org/10.15468/dl.nuvxyz>

GBIF.org (14 June 2019). GBIF Occurrence Download Corvus nasicus Temminck, 1826. Available in: <https://doi.org/10.15468/dl.uuqddm>

GBIF.org (14 June 2019). GBIF Occurrence Download Corvus sinaloae (Davis, LI, 1958). Available in: <https://doi.org/10.15468/dl.yykedn>

GBIF.org (14 June 2019). GBIF Occurrence Download Cyanocorax affinis Pelzeln, 1856. Available in: <https://doi.org/10.15468/dl.inftnw>

GBIF.org (14 June 2019). GBIF Occurrence Download Cyanocorax dickeyi Moore, RT, 1935. Available in: <https://doi.org/10.15468/dl.deomrk>

GBIF.org (14 June 2019). GBIF Occurrence Download Cyanocorax melanocyaneus (Hartlaub, 1844). Available in: <https://doi.org/10.15468/dl.fouwvh>

GBIF.org (14 June 2019). GBIF Occurrence Download Cyanocorax sanblasianus (Lafresnaye, 1842). Available in: <https://doi.org/10.15468/dl.aijskt>

GBIF.org (14 June 2019). GBIF Occurrence Download Cyanocorax yncas (Boddaert, 1783). Available in: <https://doi.org/10.15468/dl.ptzyvw>

GBIF.org (14 June 2019). GBIF Occurrence Download Cyanocorax yucatanicus (Dubois, AJC, 1875). Available in: <https://doi.org/10.15468/dl.wuphar>

GBIF.org (14 June 2019). GBIF Occurrence Download Psilorhinus morio (Wagler, 1829). Available in: <https://doi.org/10.15468/dl.2tgz5x>

GBIF.org (14 June 2019). GBIF Occurrence Download Chiroxiphia lanceolata (Wagler, 1830). Available in: <https://doi.org/10.15468/dl.mowhap>

GBIF.org (14 June 2019). GBIF Occurrence Download Chiroxiphia linearis (Bonaparte, 1838). Available in: <https://doi.org/10.15468/dl.6j357y>

GBIF.org (14 June 2019). GBIF Occurrence Download Pipreola formosa (Hartlaub, 1849). Available in: <https://doi.org/10.15468/dl.gzwfnf>

GBIF.org (14 June 2019). GBIF Occurrence Download Procnias averano (Hermann, 1783). Available in: <https://doi.org/10.15468/dl.bl9dvc>

GBIF.org (14 June 2019). GBIF Occurrence Download Donacobius atricapilla (Linnaeus, 1766). Available in: <https://doi.org/10.15468/dl.hcrnwh>

GBIF.org (14 June 2019). GBIF Occurrence Download Aimophila rufescens (Swainson, 1827) . Available in: <https://doi.org/10.15468/dl.n21x19>

GBIF.org (14 June 2019). GBIF Occurrence Download Ammodramus humeralis (Bosc, 1792). Available in: <https://doi.org/10.15468/dl.top2pr>

GBIF.org (14 June 2019). GBIF Occurrence Download Arremon phaeopleurus (Sclater, PL, 1856). Available in: <https://doi.org/10.15468/dl.ivep5a>

GBIF.org (14 June 2019). GBIF Occurrence Download Arremon schlegeli Bonaparte, 1850. Available in: <https://doi.org/10.15468/dl.rjemsx>

GBIF.org (14 June 2019). GBIF Occurrence Download Arremonops chloronotus (Salvin, 1861). Available in: <https://doi.org/10.15468/dl.1n9hp9>

GBIF.org (14 June 2019). GBIF Occurrence Download Arremonops conirostris (Bonaparte, 1850). Available in: <https://doi.org/10.15468/dl.kvw1tv>

GBIF.org (14 June 2019). GBIF Occurrence Download Arremonops rufivirgatus (Lawrence, 1851). Available in: <https://doi.org/10.15468/dl.yczaih>

GBIF.org (14 June 2019). GBIF Occurrence Download Arremonops tocuyensis Todd, 1912. Available in: <https://doi.org/10.15468/dl.jrbd5i>

GBIF.org (14 June 2019). GBIF Occurrence Download Atlapetes semirufus (Boissonneau, 1840). Available in: <https://doi.org/10.15468/dl.xejsyi>

GBIF.org (14 June 2019). GBIF Occurrence Download Junco phaeonotus Wagler, 1831. Available in: <https://doi.org/10.15468/dl.aguqvs>

GBIF.org (14 June 2019). GBIF Occurrence Download Melozone albicollis (Sclater, PL, 1858). Available in: <https://doi.org/10.15468/dl.fw2ppm>

GBIF.org (14 June 2019). GBIF Occurrence Download Melozone kieneri (Bonaparte, 1850). Available in: <https://doi.org/10.15468/dl.34zttl>

GBIF.org (14 June 2019). GBIF Occurrence Download Melozone leucotis Cabanis, 1861. Available in: <https://doi.org/10.15468/dl.zm2fvi>

GBIF.org (14 June 2019). GBIF Occurrence Download Peucaea botterii (Sclater, PL, 1858). Available in: <https://doi.org/10.15468/dl.u4gwkv>

GBIF.org (14 June 2019). GBIF Occurrence Download Peucaea carpalis (Coues, 1873). Available in: <https://doi.org/10.15468/dl.pcx8hq>

GBIF.org (14 June 2019). GBIF Occurrence Download Peucaea humeralis (Cabanis, 1851). Available in: <https://doi.org/10.15468/dl.so0v5e>

GBIF.org (14 June 2019). GBIF Occurrence Download Peucaea mystacalis (Hartlaub, 1852). Available in: <https://doi.org/10.15468/dl.maydit>

GBIF.org (14 June 2019). GBIF Occurrence Download Peucaea ruficauda (Bonaparte, 1853). Available in: <https://doi.org/10.15468/dl.zmijv1>

GBIF.org (14 June 2019). GBIF Occurrence Download Peucaea sumichrasti (Lawrence, 1871). Available in: <https://doi.org/10.15468/dl.lw2633>

GBIF.org (14 June 2019). GBIF Occurrence Download Torreornis inexpectata Barbour y Peters, 1927. Available in: <https://doi.org/10.15468/dl.0a5u4x>

GBIF.org (14 June 2019). GBIF Occurrence Download Zonotrichia capensis (Statius Müller, PL, 1776). Available in: <https://doi.org/10.15468/dl.bldxsu>

GBIF.org (14 June 2019). GBIF Occurrence Download Chamaeza turdina Cabanis y Heine, 1859. Available in: <https://doi.org/10.15468/dl.fuh6hz>

GBIF.org (14 June 2019). GBIF Occurrence Download Formicarius analis (d'Orbigny & Lafresnaye, 1837). Available in: <https://doi.org/10.15468/dl.8m6dng>

GBIF.org (14 June 2019). GBIF Occurrence Download Chlorophonia cyanea (Thunberg, 1822). Available in: <https://doi.org/10.15468/dl.mrep4j>

GBIF.org (14 June 2019). GBIF Occurrence Download Grallaricula cumanensis Hartert, 1900. Available in: <https://doi.org/10.15468/dl.rrupdd>

GBIF.org (15 June 2019). GBIF Occurrence Download Euphonia affinis (Lesson, 1842). Available in: <https://doi.org/10.15468/dl.ommjzf>

GBIF.org (15 June 2019). GBIF Occurrence Download Euphonia concinna (Sclater, PL, 1855). Available in: <https://doi.org/10.15468/dl.aqn8hv>

GBIF.org (15 June 2019). GBIF Occurrence Download Euphonia cyanocephala (Vieillot, 1819). Available in: <https://doi.org/10.15468/dl.qqbm23>

GBIF.org (15 June 2019). GBIF Occurrence Download Euphonia elegantissima (Bonaparte, 1838). Available in: <https://doi.org/10.15468/dl.ak12jy>

GBIF.org (15 June 2019). GBIF Occurrence Download Euphonia hirundinacea Bonaparte, 1838. Available in: <https://doi.org/10.15468/dl.pghp2s>

GBIF.org (15 June 2019). GBIF Occurrence Download Euphonia laniirostris D'Orbigny & Lafresnaye, 1837. Available in: <https://doi.org/10.15468/dl.bipmbw>

GBIF.org (15 June 2019). GBIF Occurrence Download Euphonia luteicapilla (Cabanis, 1861). Available in: <https://doi.org/10.15468/dl.gkmelh>

GBIF.org (15 June 2019). GBIF Occurrence Download Euphonia trinitatis Strickland, 1851. Available in: <https://doi.org/10.15468/dl.f7fqmz>

GBIF.org (15 June 2019). GBIF Occurrence Download Spinus cucullatus (Swainson, 1820). Available in: <https://doi.org/10.15468/dl.4nue6q>

GBIF.org (15 June 2019). GBIF Occurrence Download Spinus dominicensis (Bryant, H, 1867). Available in: <https://doi.org/10.15468/dl.cstfwf>

GBIF.org (15 June 2019). GBIF Occurrence Download Campylorhamphus trochilirostris (Lichtenstein, MHK, 1820). Available in: <https://doi.org/10.15468/dl.hkwysa>

GBIF.org (15 June 2019). GBIF Occurrence Download Cranioleuca subcristata (Sclater, PL, 1874). Available in: <https://doi.org/10.15468/dl.sgztt1>

GBIF.org (15 June 2019). GBIF Occurrence Download Certhiaxis cinnamomeus (Gmelin, 1788). Available in: <https://doi.org/10.15468/dl.j2lk2a>

GBIF.org (15 June 2019). GBIF Occurrence Download Dendrocincla homochroa (Sclater, 1860). Available in: <https://doi.org/10.15468/dl.xyseip>

GBIF.org (15 June 2019). GBIF Occurrence Download Dendrocolaptes picumnus Lichtenstein, MHK, 1820. Available in: <https://doi.org/10.15468/dl.n4rtcg>

GBIF.org (15 June 2019). GBIF Occurrence Download Dendrocolaptes sanctithomae (Lafresnaye, 1852). Available in: <https://doi.org/10.15468/dl.opx5o1>

GBIF.org (15 June 2019). GBIF Occurrence Download Dendroplex picus (Gmelin, JF, 1788). Available in: <https://doi.org/10.15468/dl.vyugqf>

GBIF.org (15 June 2019). GBIF Occurrence Download Furnarius leucopus Swainson, 1838. Available in: <https://doi.org/10.15468/dl.mt2lcu>

GBIF.org (15 June 2019). GBIF Occurrence Download Lepidocolaptes leucogaster (Swainson, 1827). Available in: <https://doi.org/10.15468/dl.ibcxty>

GBIF.org (15 June 2019). GBIF Occurrence Download Lepidocolaptes affinis (Lafresnaye, 1839). Available in: <https://doi.org/10.15468/dl.zsgfuh>

GBIF.org (15 June 2019). GBIF Occurrence Download Lepidocolaptes souleyetii (Lafresnaye, 1849). Available in: <https://doi.org/10.15468/dl.mcbuuo>

GBIF.org (15 June 2019). GBIF Occurrence Download Phacellodomus inornatus Ridgway, 1887. Available in: <https://doi.org/10.15468/dl.sl9dgo>

GBIF.org (15 June 2019). GBIF Occurrence Download Sittasomus griseicapillus (Vieillot, 1818). Available in: <https://doi.org/10.15468/dl.ikp3ff>

GBIF.org (15 June 2019). GBIF Occurrence Download Synallaxis albescens Temminck, 1823. Available in: <https://doi.org/10.15468/dl.qtgu9y>

GBIF.org (15 June 2019). GBIF Occurrence Download Synallaxis candei d'Orbigny & Lafresnaye, 1838. Available in: <https://doi.org/10.15468/dl.jzijqc>

GBIF.org (15 June 2019). GBIF Occurrence Download Synallaxis cinnamomea Lafresnaye, 1843. Available in: <https://doi.org/10.15468/dl.uureoe>

GBIF.org (15 June 2019). GBIF Occurrence Download Synallaxis erythrothorax Sclater, PL, 1855. Available in: <https://doi.org/10.15468/dl.swweeu>

GBIF.org (15 June 2019). GBIF Occurrence Download Syndactyla guttulata (Sclater, PL, 1858). Available in: <https://doi.org/10.15468/dl.gy9u1x>

GBIF.org (15 June 2019). GBIF Occurrence Download Xenops rutilans Temminck, 1821. Available in: <https://doi.org/10.15468/dl.beavyg>

GBIF.org (15 June 2019). GBIF Occurrence Download Xiphorhynchus susurrans (Jardine, 1847). Available in: <https://doi.org/10.15468/dl.3fvmr7>

GBIF.org (15 June 2019). GBIF Occurrence Download Xiphorhynchus flavigaster Swainson, 1827. Available in: <https://doi.org/10.15468/dl.dr59hs>

GBIF.org (15 June 2019). GBIF Occurrence Download Xiphocolaptes promeropirhynchus (Lesson, R, 1840). Available in: <https://doi.org/10.15468/dl.ifbsg4>

GBIF.org (18 June 2019). GBIF Occurrence Download Petrochelidon fulva (Vieillot, 1808). Available in: <https://doi.org/10.15468/dl.n9kwh9>

GBIF.org (18 June 2019). GBIF Occurrence Download Progne chalybea (Gmelin, JF, 1789). Available in: <https://doi.org/10.15468/dl.cu5mw8>

GBIF.org (18 June 2019). GBIF Occurrence Download Pipraeidea melanonota (Vieillot, 1819). Available in: <https://doi.org/10.15468/dl.wrggdr>

GBIF.org (19 June 2019). GBIF Occurrence Download Progne sinaloae Nelson, 1898. Available in: <https://doi.org/10.15468/dl.yzxdjr>

GBIF.org (19 June 2019). GBIF Occurrence Download Progne tapera (Linnaeus, 1766). Available in: <https://doi.org/10.15468/dl.56i67a>

GBIF.org (19 June 2019). GBIF Occurrence Download Stelgidopteryx ruficollis (Vieillot, 1817). Available in: <https://doi.org/10.15468/dl.mrfklo>

GBIF.org (19 June 2019). GBIF Occurrence Download Stelgidopteryx serripennis (Audubon, 1838). Available in: <https://doi.org/10.15468/dl.dx9cfg>

GBIF.org (19 June 2019). GBIF Occurrence Download Tachycineta albilinea (Lawrence, 1863). Available in: <https://doi.org/10.15468/dl.2mgc7t>

GBIF.org (19 June 2019). GBIF Occurrence Download Tachycineta albiventer (Boddaert, 1783). Available in: <https://doi.org/10.15468/dl.auof2g>

GBIF.org (19 June 2019). GBIF Occurrence Download Tachycineta euchrysea (Gosse, 1847). Available in: <https://doi.org/10.15468/dl.tttjvl>

GBIF.org (19 June 2019). GBIF Occurrence Download Tachycineta thalassina (Swainson, 1827). Available in: <https://doi.org/10.15468/dl.aj7hrr>

GBIF.org (19 June 2019). GBIF Occurrence Download Amblycercus holosericeus (Deppe, 1830). Available in: <https://doi.org/10.15468/dl.ct6zfj>

GBIF.org (19 June 2019). GBIF Occurrence Download Cassiculus melanicterus (Bonaparte, 1825). Available in: <https://doi.org/10.15468/dl.pfjwae>

GBIF.org (19 June 2019). GBIF Occurrence Download Chrysomus icterocephalus (Linnaeus, 1766). Available in: <https://doi.org/10.15468/dl.aemzsn>

GBIF.org (19 June 2019). GBIF Occurrence Download Dives dives (Deppe, 1830). Available in: <https://doi.org/10.15468/dl.o7o83b>

GBIF.org (19 June 2019). GBIF Occurrence Download Icterus abeillei (Lesson, R, 1839). Available in: <https://doi.org/10.15468/dl.foce2d>

GBIF.org (19 June 2019). GBIF Occurrence Download Icterus auratus Bonaparte, 1850. Available in: <https://doi.org/10.15468/dl.bced3p>

GBIF.org (19 June 2019). GBIF Occurrence Download Icterus auricapillus Cassin, 1848. Available in: <https://doi.org/10.15468/dl.tvfcxy>

GBIF.org (19 June 2019). GBIF Occurrence Download Icterus chrysater (Lesson, 1844). Available in: <https://doi.org/10.15468/dl.aesqsw>

GBIF.org (19 June 2019). GBIF Occurrence Download Icterus cucullatus Swainson, 1827. Available in: <https://doi.org/10.15468/dl.hwheqt>

GBIF.org (19 June 2019). GBIF Occurrence Download Icterus dominicensis (Linnaeus, 1766). Available in: <https://doi.org/10.15468/dl.hsstkk>

GBIF.org (19 June 2019). GBIF Occurrence Download Icterus fuertesi Chapman, 1911. Available in: <https://doi.org/10.15468/dl.iy2xbh>

GBIF.org (19 June 2019). GBIF Occurrence Download Icterus graduacauda Lesson, R, 1839. Available in: <https://doi.org/10.15468/dl.j9cslb>

GBIF.org (19 June 2019). GBIF Occurrence Download Icterus gularis (Wagler, 1829). Available in: <https://doi.org/10.15468/dl.slqgz5>

GBIF.org (19 June 2019). GBIF Occurrence Download Icterus icterus (Linnaeus, 1766). Available in: <https://doi.org/10.15468/dl.jn4c1v>

GBIF.org (19 June 2019). GBIF Occurrence Download Icterus maculialatus Cassin, 1848. Available in: <https://doi.org/10.15468/dl.dxzaiz>

GBIF.org (19 June 2019). GBIF Occurrence Download Icterus melanopsis Wagler, 1829. Available in: <https://doi.org/10.15468/dl.jopgc4>

GBIF.org (19 June 2019). GBIF Occurrence Download Icterus mesomelas (Wagler, 1829). Available in: <https://doi.org/10.15468/dl.rwerlm>

GBIF.org (19 June 2019). GBIF Occurrence Download Icterus nigrogularis (Hahn, 1819). Available in: <https://doi.org/10.15468/dl.7esvc7>

GBIF.org (19 June 2019). GBIF Occurrence Download Icterus pectoralis (Wagler, 1829). Available in: <https://doi.org/10.15468/dl.qb1o9c>

GBIF.org (19 June 2019). GBIF Occurrence Download Icterus prosthemelas (Strickland, 1850). Available in: <https://doi.org/10.15468/dl.uxi4bf>

GBIF.org (19 June 2019). GBIF Occurrence Download Icterus pustulatus (Wagler, 1829). Available in: <https://doi.org/10.15468/dl.an1yk9>

GBIF.org (19 June 2019). GBIF Occurrence Download Icterus wagleri Sclater, PL, 1857. Available in: <https://doi.org/10.15468/dl.rjca4t>

GBIF.org (19 June 2019). GBIF Occurrence Download Molothrus aeneus (Wagler, 1829). Available in: <https://doi.org/10.15468/dl.ndmm2d>

GBIF.org (19 June 2019). GBIF Occurrence Download Molothrus bonariensis (Gmelin, JF, 1789). Available in: <https://doi.org/10.15468/dl.pft2m7>

GBIF.org (19 June 2019). GBIF Occurrence Download Molothrus oryzivorus (Gmelin, JF, 1788). Available in: <https://doi.org/10.15468/dl.cggvkq>

GBIF.org (19 June 2019). GBIF Occurrence Download Psarocolius decumanus (Pallas, 1769). Available in: <https://doi.org/10.15468/dl.7in6xj>

GBIF.org (19 June 2019). GBIF Occurrence Download Psarocolius montezuma (Lesson, R, 1830). Available in: <https://doi.org/10.15468/dl.mexeew>

GBIF.org (19 June 2019). GBIF Occurrence Download Ptiloxena atroviolacea (d'Orbigny, 1839). Available in: <https://doi.org/10.15468/dl.0x4lpr>

GBIF.org (19 June 2019). GBIF Occurrence Download Quiscalus lugubris Swainson, 1838. Available in: <https://doi.org/10.15468/dl.mrhyul>

GBIF.org (19 June 2019). GBIF Occurrence Download Quiscalus mexicanus (Gmelin, JF, 1788). Available in: <https://doi.org/10.15468/dl.ik75tg>

GBIF.org (19 June 2019). GBIF Occurrence Download Lanius ludovicianus Linnaeus, 1766. Available in: <https://doi.org/10.15468/dl.tafo0a>

GBIF.org (19 June 2019). GBIF Occurrence Download Melanoptila glabrirostris Sclater, PL, 1858. Available in: <https://doi.org/10.15468/dl.odv4rv>

GBIF.org (19 June 2019). GBIF Occurrence Download Mimus gilvus (Vieillot, 1808). Available in: <https://doi.org/10.15468/dl.pyrrqv>

GBIF.org (19 June 2019). GBIF Occurrence Download Toxostoma bendirei (Coues, 1873). Available in: <https://doi.org/10.15468/dl.powlrp>

GBIF.org (19 June 2019). GBIF Occurrence Download Toxostoma guttatum (Ridgway, 1885). Available in: <https://doi.org/10.15468/dl.7vftbf>

GBIF.org (19 June 2019). GBIF Occurrence Download Baeolophus wollweberi (Bonaparte, 1850). Available in: <https://doi.org/10.15468/dl.yltl6e>

GBIF.org (19 June 2019). GBIF Occurrence Download Basileuterus culicivorus (Deppe, 1830). Available in: <https://doi.org/10.15468/dl.6tza9i>

GBIF.org (19 June 2019). GBIF Occurrence Download Basileuterus lachrymosus (Bonaparte, 1850). Available in: <https://doi.org/10.15468/dl.hspclk>

GBIF.org (19 June 2019). GBIF Occurrence Download Basileuterus rufifrons (Swainson, 1838). Available in: <https://doi.org/10.15468/dl.crfpkf>

GBIF.org (19 June 2019). GBIF Occurrence Download Geothlypis aequinoctialis (Gmelin, JF, 1789). Available in: <https://doi.org/10.15468/dl.w2eryp>

GBIF.org (19 June 2019). GBIF Occurrence Download Geothlypis beldingi Ridgway, 1882. Available in: <https://doi.org/10.15468/dl.0dhm4y>

GBIF.org (19 June 2019). GBIF Occurrence Download Geothlypis poliocephala Baird, SF, 1865. Available in: <https://doi.org/10.15468/dl.l81hai>

GBIF.org (19 June 2019). GBIF Occurrence Download Microligea palustris (Cory, 1884). Available in: <https://doi.org/10.15468/dl.whmtns>

GBIF.org (19 June 2019). GBIF Occurrence Download Myiothlypis cinereicollis (Sclater, PL, 1864). Available in: <https://doi.org/10.15468/dl.cc1kbm>

GBIF.org (19 June 2019). GBIF Occurrence Download Myiothlypis flaveola Baird, SF, 1865. Available in: <https://doi.org/10.15468/dl.xcizs3>

GBIF.org (19 June 2019). GBIF Occurrence Download Setophaga graciae (Baird, SF, 1865). Available in: <https://doi.org/10.15468/dl.8rqlcf>

GBIF.org (19 June 2019). GBIF Occurrence Download Setophaga pitiayumi (Vieillot, 1817). Available in: <https://doi.org/10.15468/dl.xpbsw6>

GBIF.org (19 June 2019). GBIF Occurrence Download Teretistris fernandinae (Lembeye, 1850). Available in: <https://doi.org/10.15468/dl.a5qcqm>

GBIF.org (19 June 2019). GBIF Occurrence Download Teretistris fornsi Gundlach, 1858. Available in: <https://doi.org/10.15468/dl.fdfz1k>

GBIF.org (19 June 2019). GBIF Occurrence Download Ceratopipra mentalis (Sclater, PL, 1857). Available in: <https://doi.org/10.15468/dl.zvgm4f>

GBIF.org (19 June 2019). GBIF Occurrence Download Manacus manacus (Linnaeus, 1766). Available in: <https://doi.org/10.15468/dl.zilljp>

GBIF.org (20 June 2019). GBIF Occurrence Download Polioptila lembeyei (Gundlach, 1858). Available in: <https://doi.org/10.15468/dl.yzp8vt>

GBIF.org (20 June 2019). GBIF Occurrence Download Polioptila nigriceps Baird, SF, 1864. Available in: <https://doi.org/10.15468/dl.njndax>

GBIF.org (20 June 2019). GBIF Occurrence Download Polioptila plumbea (Gmelin, JF, 1788). Available in: <https://doi.org/10.15468/dl.qbzqfj>

GBIF.org (20 June 2019). GBIF Occurrence Download Ramphocaenus melanurus Vieillot, 1819. Available in: <https://doi.org/10.15468/dl.xcxbgi>

GBIF.org (20 June 2019). GBIF Occurrence Download Ptilogonys cinereus Swainson, 1827. Available in: <https://doi.org/10.15468/dl.umgxdu>

GBIF.org (20 June 2019). GBIF Occurrence Download Auriparus flaviceps (Sundevall, 1850). Available in: <https://doi.org/10.15468/dl.xvavjy>

GBIF.org (20 June 2019). GBIF Occurrence Download Clytoctantes alixii Elliot, DG, 1870. Available in: <https://doi.org/10.15468/dl.npdmy1>

GBIF.org (20 June 2019). GBIF Occurrence Download Dysithamnus mentalis (Temminck, 1823). Available in: <https://doi.org/10.15468/dl.gnpbvc>

GBIF.org (20 June 2019). GBIF Occurrence Download Formicivora grisea Boddaert, 1783. Available in: <https://doi.org/10.15468/dl.ltql4p>

GBIF.org (20 June 2019). GBIF Occurrence Download Formicivora intermedia Cabanis, 1847. Available in: <https://doi.org/10.15468/dl.yrlaaz>

GBIF.org (20 June 2019). GBIF Occurrence Download Herpsilochmus rufimarginatus (Temminck, 1822). Available in: <https://doi.org/10.15468/dl.okuxoa>

GBIF.org (20 June 2019). GBIF Occurrence Download Myrmeciza longipes (Swainson, 1825). Available in: <https://doi.org/10.15468/dl.7wwdej>

GBIF.org (20 June 2019). GBIF Occurrence Download Sakesphorus canadensis (Linnaeus, 1766). Available in: <https://doi.org/10.15468/dl.sooglg>

GBIF.org (20 June 2019). GBIF Occurrence Download Taraba major (Vieillot, 1816). Available in: <https://doi.org/10.15468/dl.wnuhlk>

GBIF.org (20 June 2019). GBIF Occurrence Download Thamnophilus atrinucha Salvin & Godman, 1892. Available in: <https://doi.org/10.15468/dl.ixppqy>

GBIF.org (20 June 2019). GBIF Occurrence Download Thamnophilus bridgesi Sclater, PL, 1856. Available in: <https://doi.org/10.15468/dl.qarisn>

GBIF.org (20 June 2019). GBIF Occurrence Download Thamnophilus doliatus (Linnaeus, 1764). Available in: <https://doi.org/10.15468/dl.tbhf4k>

GBIF.org (20 June 2019). GBIF Occurrence Download Thamnophilus melanonotus Sclater, PL, 1855. Available in: <https://doi.org/10.15468/dl.eyshl0>

GBIF.org (20 June 2019). GBIF Occurrence Download Thamnophilus multistriatus Lafresnaye, 1844. Available in: <https://doi.org/10.15468/dl.yx0plp>

GBIF.org (20 June 2019). GBIF Occurrence Download Thamnophilus nigriceps Sclater, PL, 1869. Available in: <https://doi.org/10.15468/dl.fz47p5>

GBIF.org (20 June 2019). GBIF Occurrence Download Calyptophilus tertius Wetmore, 1929. Available in: <https://doi.org/10.15468/dl.xxhcfh>

GBIF.org (20 June 2019). GBIF Occurrence Download Conirostrum bicolor (Vieillot, 1809). Available in: <https://doi.org/10.15468/dl.y3l8hz>

GBIF.org (20 June 2019). GBIF Occurrence Download Conirostrum leucogenys (Lafresnaye, 1852). Available in: <https://doi.org/10.15468/dl.l5lbmj>

GBIF.org (20 June 2019). GBIF Occurrence Download Coryphospingus pileatus (zu Wied-Neuwied, 1821). Available in: <https://doi.org/10.15468/dl.uncv3i>

GBIF.org (20 June 2019). GBIF Occurrence Download Cyanerpes cyaneus (Linnaeus, 1766). Available in: <https://doi.org/10.15468/dl.euxgjn>

GBIF.org (20 June 2019). GBIF Occurrence Download Dacnis cayana (Linnaeus, 1766). Available in: <https://doi.org/10.15468/dl.prakmo>

GBIF.org (20 June 2019). GBIF Occurrence Download Diglossa baritula Wagler, 1832. Available in: <https://doi.org/10.15468/dl.eygxof>

GBIF.org (20 June 2019). GBIF Occurrence Download Emberizoides herbicola (Vieillot, 1817). Available in: <https://doi.org/10.15468/dl.zsyyjg>

GBIF.org (20 June 2019). GBIF Occurrence Download Eucometis penicillata (von Spix, 1825). Available in: <https://doi.org/10.15468/dl.fbqdzt>

GBIF.org (20 June 2019). GBIF Occurrence Download Hemithraupis guira (Linnaeus, 1766). Available in: <https://doi.org/10.15468/dl.e7pvdw>

GBIF.org (20 June 2019). GBIF Occurrence Download Nemosia pileata (Boddaert, 1783). Available in: <https://doi.org/10.15468/dl.xtguyd>

GBIF.org (20 June 2019). GBIF Occurrence Download Oryzoborus crassirostris (Gmelin, JF, 1789). Available in: <https://doi.org/10.15468/dl.ffxu5s>

GBIF.org (20 June 2019). GBIF Occurrence Download Oryzoborus funereus Sclater, PL, 1860. Available in: <https://doi.org/10.15468/dl.a1buns>

GBIF.org (20 June 2019). GBIF Occurrence Download Phaenicophilus palmarum (Linnaeus, 1766). Available in: <https://doi.org/10.15468/dl.ha5qqp>

GBIF.org (20 June 2019). GBIF Occurrence Download Ramphocelus dimidiatus Lafresnaye, 1837. Available in: <https://doi.org/10.15468/dl.1qnugd>

GBIF.org (20 June 2019). GBIF Occurrence Download Ramphocelus flammigerus (Jardine & Selby, 1833). Available in: <https://doi.org/10.15468/dl.hzkgh7>

GBIF.org (20 June 2019). GBIF Occurrence Download Rhodinocichla rosea (Lesson, R, 1832). Available in: <https://doi.org/10.15468/dl.1nxmmh>

GBIF.org (20 June 2019). GBIF Occurrence Download Saltator atriceps (Lesson, R, 1832). Available in: <https://doi.org/10.15468/dl.pgttu2>

GBIF.org (20 June 2019). GBIF Occurrence Download Saltator coerulescens Vieillot, 1817. Available in: <https://doi.org/10.15468/dl.z69lil>

GBIF.org (20 June 2019). GBIF Occurrence Download Saltator maximus (Statius Müller, PL, 1776). Available in: <https://doi.org/10.15468/dl.jjq7ef>

GBIF.org (20 June 2019). GBIF Occurrence Download Saltator orenocensis Lafresnaye, 1846. Available in: <https://doi.org/10.15468/dl.ngjhrk>

GBIF.org (20 June 2019). GBIF Occurrence Download Saltator striatipectus Lafresnaye, 1847. Available in: <https://doi.org/10.15468/dl.ff86je>

GBIF.org (20 June 2019). GBIF Occurrence Download Sicalis flaveola (Linnaeus, 1766). Available in: <https://doi.org/10.15468/dl.e3s1dd>

GBIF.org (20 June 2019). GBIF Occurrence Download Sporophila corvina (Sclater, PL, 1860). Available in: <https://doi.org/10.15468/dl.taeylz>

GBIF.org (21 June 2019). GBIF Occurrence Download Sporophila intermedia Cabanis, 1851. Available in: <https://doi.org/10.15468/dl.kqpu15>

GBIF.org (21 June 2019). GBIF Occurrence Download Sporophila minuta (Linnaeus, 1758). Available in: <https://doi.org/10.15468/dl.398m2z>

GBIF.org (21 June 2019). GBIF Occurrence Download Sporophila nigricollis (Vieillot, 1823). Available in: <https://doi.org/10.15468/dl.vns7ls>

GBIF.org (21 June 2019). GBIF Occurrence Download Sporophila plumbea (zu Wied-Neuwied, 1830). Available in: <https://doi.org/10.15468/dl.npj9go>

GBIF.org (21 June 2019). GBIF Occurrence Download Sporophila torqueola (Bonaparte, 1850). Available in: <https://doi.org/10.15468/dl.pdvygj>

GBIF.org (21 June 2019). GBIF Occurrence Download Spindalis zena (Linnaeus, 1758). Available in: <https://doi.org/10.15468/dl.uyugrr>

GBIF.org (21 June 2019). GBIF Occurrence Download Tachyphonus rufus (Boddaert, 1783). Available in: <https://doi.org/10.15468/dl.qh5xrp>

GBIF.org (21 June 2019). GBIF Occurrence Download Tangara cayana (Linnaeus, 1766). Available in: <https://doi.org/10.15468/dl.yqhcvz>

GBIF.org (21 June 2019). GBIF Occurrence Download Tersina viridis (Illiger, 1811). Available in: <https://doi.org/10.15468/dl.dgf4pj>

GBIF.org (21 June 2019). GBIF Occurrence Download Thraupis abbas (Deppe, 1830). Available in: <https://doi.org/10.15468/dl.2zuwdv>

GBIF.org (21 June 2019). GBIF Occurrence Download Thraupis episcopus (Linnaeus, 1766). Available in: <https://doi.org/10.15468/dl.rjs3t1>

GBIF.org (21 June 2019). GBIF Occurrence Download Thraupis glaucocolpa Cabanis, 1850. Available in: <https://doi.org/10.15468/dl.ylrawv>

GBIF.org (21 June 2019). GBIF Occurrence Download Tiaris bicolor (Linnaeus, 1766). Available in: <https://doi.org/10.15468/dl.sy3oti>

GBIF.org (21 June 2019). GBIF Occurrence Download Tiaris canorus (Gmelin, JF, 1789). Available in: <https://doi.org/10.15468/dl.awvyp6>

GBIF.org (21 June 2019). GBIF Occurrence Download Tiaris fuliginosus (zu Wied-Neuwied, 1830). Available in: <https://doi.org/10.15468/dl.jy82ik>

GBIF.org (21 June 2019). GBIF Occurrence Download Tiaris obscurus (d'Orbigny & Lafresnaye, 1837). Available in: <https://doi.org/10.15468/dl.zl5t0n>

GBIF.org (21 June 2019). GBIF Occurrence Download Tiaris olivaceus (Linnaeus, 1766). Available in: <https://doi.org/10.15468/dl.t16ryn>

GBIF.org (21 June 2019). GBIF Occurrence Download Volatinia jacarina (Linnaeus, 1766). Available in: <https://doi.org/10.15468/dl.re5kfl>

GBIF.org (21 June 2019). GBIF Occurrence Download Pachyramphus aglaiae (Lafresnaye, 1839). Available in: <https://doi.org/10.15468/dl.a37jox>

GBIF.org (21 June 2019). GBIF Occurrence Download Pachyramphus albogriseus Sclater, PL, 1857. Available in: <https://doi.org/10.15468/dl.zijpzi>

GBIF.org (21 June 2019). GBIF Occurrence Download Pachyramphus castaneus (Jardine & Selby, 1827). Available in: <https://doi.org/10.15468/dl.7eltod>

GBIF.org (21 June 2019). GBIF Occurrence Download Pachyramphus cinnamomeus Lawrence, 1861. Available in: <https://doi.org/10.15468/dl.ibgodi>

GBIF.org (21 June 2019). GBIF Occurrence Download Pachyramphus homochrous Sclater, PL, 1859. Available in: <https://doi.org/10.15468/dl.klnv82>

GBIF.org (21 June 2019). GBIF Occurrence Download Pachyramphus major (Cabanis, 1847). Available in: <https://doi.org/10.15468/dl.jkdumg>

GBIF.org (21 June 2019). GBIF Occurrence Download Pachyramphus polychopterus (Vieillot, 1818). Available in: <https://doi.org/10.15468/dl.8lq96j>

GBIF.org (21 June 2019). GBIF Occurrence Download Tityra cayana (Linnaeus, 1766). Available in: <https://doi.org/10.15468/dl.4reuqb>

GBIF.org (21 June 2019). GBIF Occurrence Download Tityra inquisitor (Lichtenstein, MHK, 1823). Available in: <https://doi.org/10.15468/dl.etjsmx>

GBIF.org (21 June 2019). GBIF Occurrence Download Tityra semifasciata (von Spix, 1825). Available in: <https://doi.org/10.15468/dl.qecwra>

GBIF.org (21 June 2019). GBIF Occurrence Download Xenopsaris albinucha (Burmeister, 1869). Available in: <https://doi.org/10.15468/dl.gucbgg>

GBIF.org (21 June 2019). GBIF Occurrence Download Campylorhynchus capistratus (Lesson, R, 1842). Available in: <https://doi.org/10.15468/dl.r6cqdl>

GBIF.org (21 June 2019). GBIF Occurrence Download Campylorhynchus chiapensis Salvin & Godman, 1891. Available in: <https://doi.org/10.15468/dl.qcc34e>

GBIF.org (21 June 2019). GBIF Occurrence Download Campylorhynchus griseus (Swainson, 1838). Available in: <https://doi.org/10.15468/dl.img3jz>

GBIF.org (21 June 2019). GBIF Occurrence Download Campylorhynchus gularis Sclater, PL, 1861. Available in: <https://doi.org/10.15468/dl.p8g4rr>

GBIF.org (21 June 2019). GBIF Occurrence Download Campylorhynchus humilis Sclater, PL, 1857. Available in: <https://doi.org/10.15468/dl.nkx6yk>

GBIF.org (21 June 2019). GBIF Occurrence Download Campylorhynchus jocosus Sclater, PL, 1860. Available in: <https://doi.org/10.15468/dl.qokbc3>

GBIF.org (21 June 2019). GBIF Occurrence Download Campylorhynchus nuchalis Cabanis, 1847. Available in: <https://doi.org/10.15468/dl.yncq8v>

GBIF.org (21 June 2019). GBIF Occurrence Download Campylorhynchus rufinucha (Lesson, R, 1838). Available in: <https://doi.org/10.15468/dl.pzbgql>

GBIF.org (21 June 2019). GBIF Occurrence Download Campylorhynchus yucatanicus (Hellmayr, 1934). Available in: <https://doi.org/10.15468/dl.b8jf75>

GBIF.org (21 June 2019). GBIF Occurrence Download Campylorhynchus zonatus (Lesson, R, 1832). Available in: <https://doi.org/10.15468/dl.vmwnab>

GBIF.org (21 June 2019). GBIF Occurrence Download Cantorchilus modestus (Cabanis, 1861). Available in: <https://doi.org/10.15468/dl.quhj62>

GBIF.org (21 June 2019). GBIF Occurrence Download Hylorchilus navai Crossin & Ely, 1973. Available in: <https://doi.org/10.15468/dl.hoebt0>

GBIF.org (21 June 2019). GBIF Occurrence Download Pheugopedius fasciatoventris (Lafresnaye, 1845). Available in: <https://doi.org/10.15468/dl.u3tjwf>

GBIF.org (21 June 2019). GBIF Occurrence Download Pheugopedius felix (Sclater, PL, 1860). Available in: <https://doi.org/10.15468/dl.l5xoc3>

GBIF.org (21 June 2019). GBIF Occurrence Download Pheugopedius maculipectus (Lafresnaye, 1845). Available in: <https://doi.org/10.15468/dl.gjvzjz>

GBIF.org (21 June 2019). GBIF Occurrence Download Pheugopedius rutilus (Vieillot, 1819). Available in: <https://doi.org/10.15468/dl.ggzdye>

GBIF.org (21 June 2019). GBIF Occurrence Download Thryophilus pleurostictus (Sclater, PL, 1860). Available in: <https://doi.org/10.15468/dl.mvvt9t>

GBIF.org (21 June 2019). GBIF Occurrence Download Thryophilus rufalbus (Lafresnaye, 1845). Available in: <https://doi.org/10.15468/dl.jjtwa4>

GBIF.org (21 June 2019). GBIF Occurrence Download Thryophilus sinaloa Baird, SF, 1864. Available in: <https://doi.org/10.15468/dl.ch91rt>

GBIF.org (21 June 2019). GBIF Occurrence Download Troglodytes aedon Vieillot, 1809. Available in: <https://doi.org/10.15468/dl.f1spws>

GBIF.org (21 June 2019). GBIF Occurrence Download Uropsila leucogastra (Gould, 1837). Available in: <https://doi.org/10.15468/dl.s4l6nt>

GBIF.org (21 June 2019). GBIF Occurrence Download Catharus aurantiirostris (Hartlaub, 1850). Available in: <https://doi.org/10.15468/dl.w5hyv4>

GBIF.org (21 June 2019). GBIF Occurrence Download Turdus assimilis Cabanis, 1850. Available in: <https://doi.org/10.15468/dl.gftc7l>

GBIF.org (21 June 2019). GBIF Occurrence Download Turdus flavipes Vieillot, 1818. Available in: <https://doi.org/10.15468/dl.0y9wwz>

GBIF.org (21 June 2019). GBIF Occurrence Download Turdus fumigatus Lichtenstein, MHK, 1823. Available in: <https://doi.org/10.15468/dl.pxtgy1>

GBIF.org (21 June 2019). GBIF Occurrence Download Turdus grayi Bonaparte, 1838. Available in: <https://doi.org/10.15468/dl.ptmffq>

GBIF.org (21 June 2019). GBIF Occurrence Download Turdus infuscatus (Lafresnaye, 1844). Available in: <https://doi.org/10.15468/dl.u7yt17>

GBIF.org (21 June 2019). GBIF Occurrence Download Turdus leucomelas Vieillot, 1818. Available in: <https://doi.org/10.15468/dl.slrbyt>

GBIF.org (21 June 2019). GBIF Occurrence Download Turdus nudigenis Lafresnaye, 1848. Available in: <https://doi.org/10.15468/dl.bkmss7>

GBIF.org (21 June 2019). GBIF Occurrence Download Turdus plumbeus Linnaeus, 1758. Available in: <https://doi.org/10.15468/dl.lhxt7p>

GBIF.org (21 June 2019). GBIF Occurrence Download Turdus rufopalliatus Lafresnaye, 1840. Available in: <https://doi.org/10.15468/dl.asfiub>

GBIF.org (21 June 2019). GBIF Occurrence Download Turdus swalesi (Wetmore, 1927). Available in: <https://doi.org/10.15468/dl.0r3xfb>

GBIF.org (21 June 2019). GBIF Occurrence Download Arundinicola leucocephala (Linnaeus, 1764). Available in: <https://doi.org/10.15468/dl.enefal>

GBIF.org (21 June 2019). GBIF Occurrence Download Atalotriccus pilaris (Cabanis, 1847). Available in: <https://doi.org/10.15468/dl.fm8clg>

GBIF.org (21 June 2019). GBIF Occurrence Download Attila spadiceus (Gmelin, JF, 1789). Available in: <https://doi.org/10.15468/dl.dtw0if>

GBIF.org (21 June 2019). GBIF Occurrence Download Camptostoma imberbe (Sclater, 1857). Available in: <https://doi.org/10.15468/dl.pqw1ek>

GBIF.org (21 June 2019). GBIF Occurrence Download Camptostoma obsoletum (Temminck, 1824). Available in: <https://doi.org/10.15468/dl.hixm8l>

GBIF.org (21 June 2019). GBIF Occurrence Download Capsiempis flaveola (Lichtenstein, 1823). Available in: <https://doi.org/10.15468/dl.7fhehx>

GBIF.org (21 June 2019). GBIF Occurrence Download Cnemotriccus fuscatus (zu Wied-Neuwied, 1831). Available in: <https://doi.org/10.15468/dl.8eqric>

GBIF.org (21 June 2019). GBIF Occurrence Download Colonia colonus (Vieillot, 1818). Available in: <https://doi.org/10.15468/dl.mv9yes>

GBIF.org (21 June 2019). GBIF Occurrence Download Contopus cinereus (von Spix, 1825). Available in: <https://doi.org/10.15468/dl.2udv9l>

GBIF.org (21 June 2019). GBIF Occurrence Download Contopus caribaeus (d'Orbigny, 1839). Available in: <https://doi.org/10.15468/dl.cm97u9>

GBIF.org (21 June 2019). GBIF Occurrence Download Contopus hispaniolensis (Bryant, H, 1867). Available in: <https://doi.org/10.15468/dl.8omkrh>

GBIF.org (21 June 2019). GBIF Occurrence Download Deltarhynchus flammulatus (Lawrence, 1875). Available in: <https://doi.org/10.15468/dl.4hljgx>

GBIF.org (21 June 2019). GBIF Occurrence Download Elaenia cristata Pelzeln, 1868. Available in: <https://doi.org/10.15468/dl.g8ig5b>

GBIF.org (21 June 2019). GBIF Occurrence Download Elaenia chiriquensis Lawrence, 1865. Available in: <https://doi.org/10.15468/dl.0qjhjc>

GBIF.org (21 June 2019). GBIF Occurrence Download Elaenia flavogaster (Thunberg, 1822). Available in: <https://doi.org/10.15468/dl.8tzze5>

GBIF.org (21 June 2019). GBIF Occurrence Download Elaenia martinica (Linnaeus, 1766). Available in: <https://doi.org/10.15468/dl.kkrnlc>

GBIF.org (21 June 2019). GBIF Occurrence Download Euscarthmus meloryphus zu Wied-Neuwied, 1831. Available in: <https://doi.org/10.15468/dl.zmdyh0>

GBIF.org (21 June 2019). GBIF Occurrence Download Hemitriccus margaritaceiventer (d'Orbigny & Lafresnaye, 1837). Available in: <https://doi.org/10.15468/dl.ugcwp4>

GBIF.org (21 June 2019). GBIF Occurrence Download Inezia caudata (Salvin, 1897). Available in: <https://doi.org/10.15468/dl.tbwtme>

GBIF.org (21 June 2019). GBIF Occurrence Download Inezia tenuirostris (Cory, 1913). Available in: <https://doi.org/10.15468/dl.i6w6am>

GBIF.org (22 June 2019). GBIF Occurrence Download Lathrotriccus euleri (Cabanis, 1868). Available in: <https://doi.org/10.15468/dl.ajunnt>

GBIF.org (22 June 2019). GBIF Occurrence Download Legatus leucophaius (Vieillot, 1818). Available in: <https://doi.org/10.15468/dl.lmltxy>

GBIF.org (22 June 2019). GBIF Occurrence Download Leptopogon amaurocephalus Cabanis, 1846. Available in: <https://doi.org/10.15468/dl.uwwzmk>

GBIF.org (22 June 2019). GBIF Occurrence Download Machetornis rixosa (Vieillot, 1819). Available in: <https://doi.org/10.15468/dl.pxib5r>

GBIF.org (22 June 2019). GBIF Occurrence Download Megarynchus pitangua (Linnaeus, 1766). Available in: <https://doi.org/10.15468/dl.qdktlh>

GBIF.org (22 June 2019). GBIF Occurrence Download Mitrephanes phaeocercus (Sclater, PL, 1859). Available in: <https://doi.org/10.15468/dl.nxev5h>
