# Supplementary material
Source: Elsevier journal article supplement (https://www.sciencedirect.com/science/article/pii/S253006442030002X)
Supplement: mmc5 [file S253006442030002X:mmc5.pdf]

**Appendix S5.** List of the type of Protected Areas included in the priority areas analysis for the conservation of birds associated to the endangered Neotropical seasonally dry forests.

| Protected Area Type                     | IUCN category | Protection type          | Countries                                                                                         |
|-----------------------------------------|---------------|--------------------------|---------------------------------------------------------------------------------------------------|
| Anthropological Reserve                 | Not Reported  | National                 | Honduras                                                                                          |
| Area Subject to Ecological Conservation | Not Reported  | National                 | Mexico                                                                                            |
| Biological Reserve                      | Ia, VI        | National                 | Costa Rica, Honduras                                                                              |
| Biosphere Reserve                       | Ia, VI        | National                 | Guatemala, Mexico, Nicaragua                                                                      |
| City Park                               | Not Reported  | National                 | Mexico                                                                                            |
| Conservation Area                       | VI            | National                 | Costa Rica                                                                                        |
| Ecological Conservation Area            | Not Reported  | National                 | Mexico                                                                                            |
| Ecological Reserve                      | II            | National                 | Cuba                                                                                              |
| Fauna and Flora Sanctuary               | IV            | National                 | Colombia                                                                                          |
| Flora and Fauna Protection Area         | Ia, VI        | National                 | Mexico                                                                                            |
| Forest Reserve                          | VI            | National                 | Costa Rica, Dominican Republic, Panama, Venezuela                                                 |
| Forest Reserve Protectress Regional     | VI            | National                 | Colombia                                                                                          |
| Habitat Management Area by Species      | IV            | National                 | Honduras                                                                                          |
| Integrated Management Regional District | VI            | National                 | Colombia                                                                                          |
| Multiple Use Area                       | III           | National                 | Guatemala                                                                                         |
| Municipal Park                          | Not Reported  | National                 | Mexico                                                                                            |
| National Forest                         | Not Reported  | National                 | Honduras                                                                                          |
| National Monument                       | III           | National                 | Nicaragua                                                                                         |
| National Recreation Area                | V             | National                 | Dominican Republic                                                                                |
| National Parks and Statal Parks         | II            | National                 | Costa Rica, Cuba, Dominican Republic, El Salvador, Honduras, Mexico, Nicaragua, Panama, Venezuela |
| Natural Monument                        | III           | National / International | Dominican Republic, Haiti, Honduras, Mexico, Venezuela                                            |
| Natural Outstanding Element             | III           | National                 | Cuba                                                                                              |
| Natural Park                            | II            | National                 | Colombia, Mexico                                                                                  |
| Natural Reserve                         | Ia            | National                 | Cuba                                                                                              |
| Natural Resources Protection Area       | VI            | National                 | Mexico                                                                                            |
| Nature Reserves                         | IV            | National                 | Costa Rica, Nicaragua                                                                             |
| Park Way                                | III           | National                 | Colombia                                                                                          |
| Patrimonial Reserve                     | Not Reported  | National                 | Mexico                                                                                            |
| Private Natural Reserve                 | IV, V, VI     | National                 | Guatemala                                                                                         |

|                                                 |              |                        |                                                                      |
|-------------------------------------------------|--------------|------------------------|----------------------------------------------------------------------|
| Protected Area                                  | Not Reported | National               | Mexico                                                               |
| Protected Area of Managed Resources             | II, IV       | National               | Cuba                                                                 |
| Protected Natural Landscape/Seascape            | V            | National               | Cuba                                                                 |
| Protective Zone                                 | V            | National               | Costa Rica, Venezuela                                                |
| Ramsar Site                                     | Not Reported | Internacional          | Costa Rica, Cuba, Dominican Republic, Nicaragua, Venezuela           |
| Sanctuary                                       | II           | National               | Mexico                                                               |
| Special Zone of Marine Protection               | Not Reported | National               | Panama                                                               |
| Specially Protected Area (Cartagena Convention) | IV           | Regional/International | Colombia, Cuba, Dominican Republic                                   |
| Spetial Protection Zone                         | Not Reported | National               | Mexico                                                               |
| Statal Reserve                                  | Not Reported | National               | Mexico                                                               |
| UNESCO-MAB Biosphere Reserve                    | VI           | Internacional          | Cuba, Mexico, Honduras                                               |
| Voluntary Conservation Area                     | VI           | National               | Mexico                                                               |
| Wildlife Refuge                                 | IV           | National               | Costa Rica, Cuba, Dominican Republic, Honduras, Nicaragua, Venezuela |
| Wildlife Reserve                                | Ia, IV       | National               | Venezuela                                                            |
| World Heritage Site                             | Not Reported | Internacional          | Costa Rica, Cuba, Panama, Mexico                                     |
