# Supplementary material
Source: Elsevier journal article supplement (https://www.sciencedirect.com/science/article/pii/S253006442030002X)

**Appendix S6. Species richness patterns for avifauna associated to “northern” Neotropical seasonally dry forests (NSDF) projected under two representative concentration pathways of greenhouse gas concentration (RCP 4.5 and 8.5) for years 2050 and 2070, and considering a not-dispersal ability of species.** Inserted histograms in maps represent the number of species and their proportional change (i.e., 0-25%, 25-50%, and >50%) losing (gray) in the distributional areas between current climatic conditions and future scenarios. Acronyms and colors in the graphs correspond to the names for the six main NSDF-regions analyzed herein: Caribbean islands (CA), northwestern Mexico (NMx), Yucatan Peninsula (YP), Central America, (CAm) Caribbean coast of Colombia-Venezuela (CCV), and the northern Inter-Andean valleys in Colombia (NIAv). Graphic correspond to means (black circles) and standard deviations (horizontal bars) values for the proportional richness, mean proportional range size and covariance for avifauna associated to Neotropical seasonally dry forests (NSDF) regions under current climatic conditions and different climate change scenarios considering the not-dispersal ability of species.


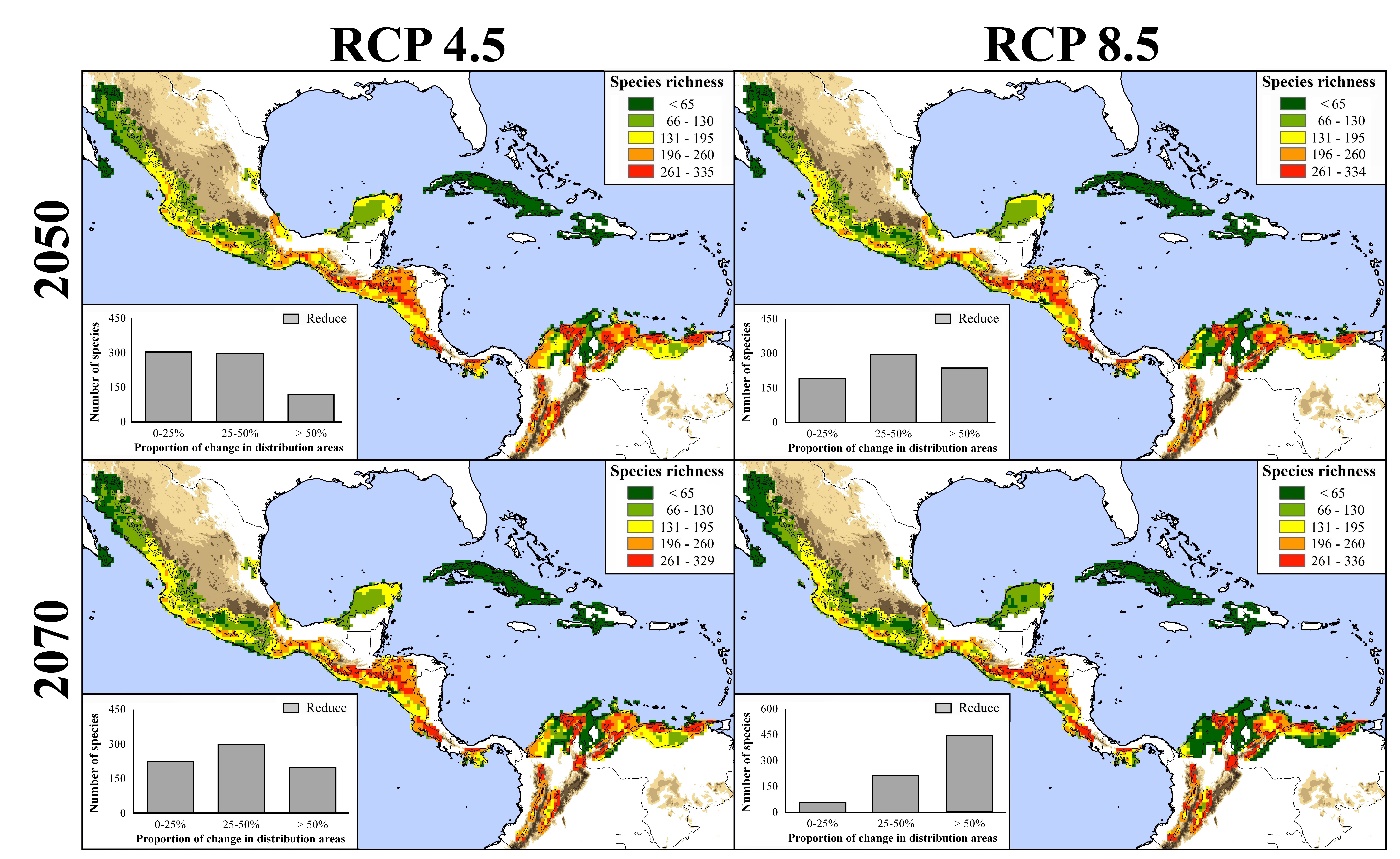


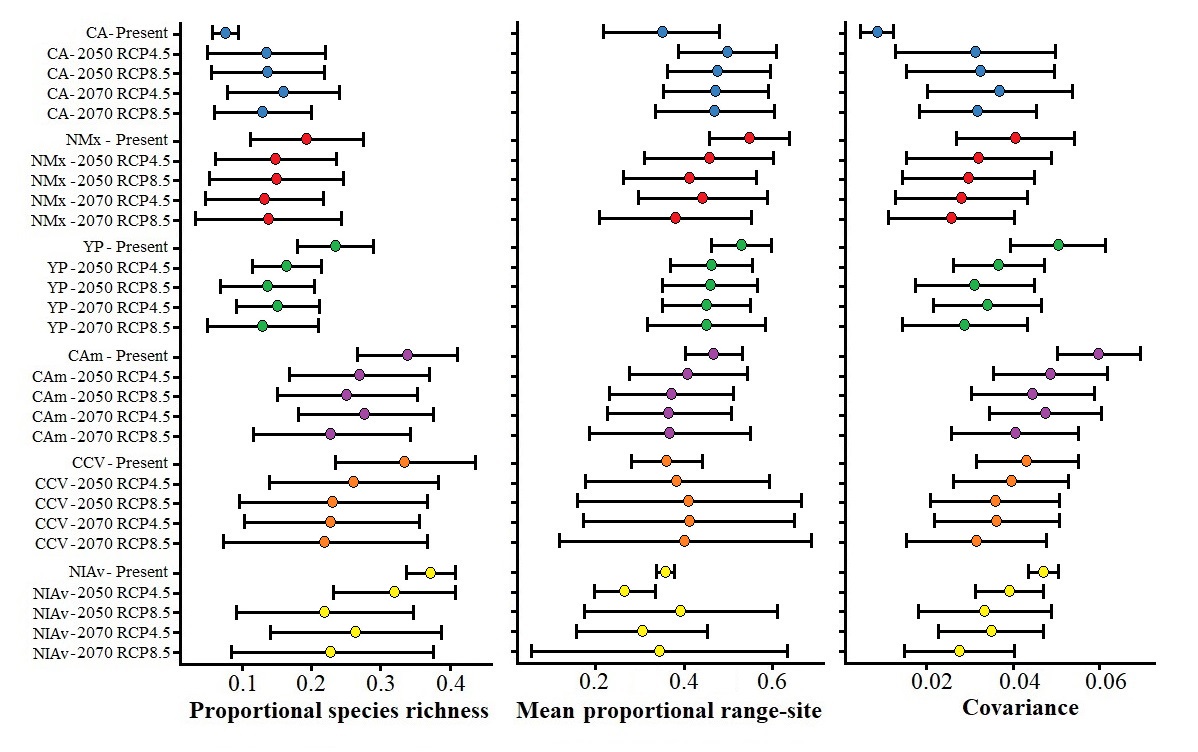

Supplement: mmc6 [file S253006442030002X:mmc6.docx]
